# Supplementary material
Source: publisher figshare collection journal article supplement (https://acs.figshare.com/ndownloader/files/3987001)

Supplementary Materials For

**Synthesis and Biological Assessment of a Triazine Dendrimer with 16 Paclitaxel Groups**

Changsuk Lee<sup>a</sup>, Su-Tang Lo<sup>b</sup>, Jongdoo Lim<sup>a</sup>, Viviana C. P. da Costa<sup>a</sup>, Saleh Ramezani<sup>b</sup>, Giovanni M. Pavan<sup>c</sup>, Onofrio Annunziata<sup>a</sup>, Xiankai Sun<sup>b</sup>, Eric E. Simanek<sup>a\*</sup>

*<sup>a</sup>Department of Chemistry, Texas Christian University, Fort Worth TX 76129.*

*<sup>b</sup>Department of Radiology and advanced Imaging Research Center, University of Texas Southwestern Medical Center, Dallas, Texas 75390.*

*<sup>c</sup>University of Applied Sciences of Southern Switzerland (SUPSI), Manno Switzerland.*

\*To whom correspondence should be addressed. E-mail: e.simanek@tcu.edu; tel: 817-257-5355

## Table of Contents

|                                                                                                 | Page |
|-------------------------------------------------------------------------------------------------|------|
| General Synthetic Procedures.....                                                               | S3   |
| Synthetic Procedures and MS, HPLC, GPC, <sup>1</sup> H, and <sup>13</sup> C of <b>1</b> .....   | S4   |
| Synthetic Procedures and MS, <sup>1</sup> H, and <sup>13</sup> C of Compound of <b>4</b> .....  | S10  |
| Synthetic Procedures and MS, <sup>1</sup> H, and <sup>13</sup> C of Compound of <b>5</b> .....  | S16  |
| Synthetic Procedures and MS, <sup>1</sup> H, and <sup>13</sup> C of Compound of <b>6</b> .....  | S21  |
| Synthetic Procedures and MS, <sup>1</sup> H, and <sup>13</sup> C of Compound of <b>S1</b> ..... | S25  |
| Synthetic Procedures and MS, <sup>1</sup> H, and <sup>13</sup> C of Compound of <b>7</b> .....  | S29  |
| Synthetic Procedures and MS, <sup>1</sup> H, and <sup>13</sup> C of Compound of <b>8</b> .....  | S33  |
| Synthetic Procedures and MS, <sup>1</sup> H, and <sup>13</sup> C of Compound of <b>S5</b> ..... | S37  |
| Synthetic Procedures and MS, <sup>1</sup> H, and <sup>13</sup> C of Compound of <b>9</b> .....  | S41  |
| Synthetic Procedures and MS, <sup>1</sup> H, and <sup>13</sup> C of Compound of <b>13</b> ..... | S45  |
| Synthetic Procedures and MS, <sup>1</sup> H, and <sup>13</sup> C of Compound of <b>14</b> ..... | S49  |
| Synthetic Procedures and MS, and <sup>1</sup> H of Compound of <b>15</b> .....                  | S53  |
| Light-scattering distribution analysis of <b>1</b> .....                                        | S56  |
| Cumulative PTX release graph .....                                                              | S57  |
| HPLC trace of PTX from prodrug <b>1</b> in plasma .....                                         | S58  |
| HPLC trace of expected cleavage products .....                                                  | S59  |
| HPLC trace of PTX from model compound <b>12</b> in plasma .....                                 | S60  |
| Cumulative excretion data <b>1</b> and <b>3</b> found in the urine and feces.....               | S61  |
| Elimination and distribution half-lives of prodrug <b>1</b> and <b>3</b> .....                  | S61  |
| Biodistribution at 24h for <b>1</b> in SCID-PC-3 mice .....                                     | S62  |

## **General Synthetic Procedures**

All chemicals were purchased from Aldrich and Acros and used without further purification. All solvents were ACS grade and used without further purification. HPLC was carried out using an Agilent Technologies 1260 Infinity system and an Agilent Technologies 1260 Infinity DAD detector. NMR spectra were recorded on a Mercury 300 MHz spectrometer in CDCl<sub>3</sub>. All ESI mass spectral analyses were carried out by an Agilent Technologies 6224 TOF LC/MS system. All MALDI mass spectral analyses were carried out by the Laboratory for Biological Mass Spectrometry at Texas A&M University.

## Synthesis of prodrug **1**

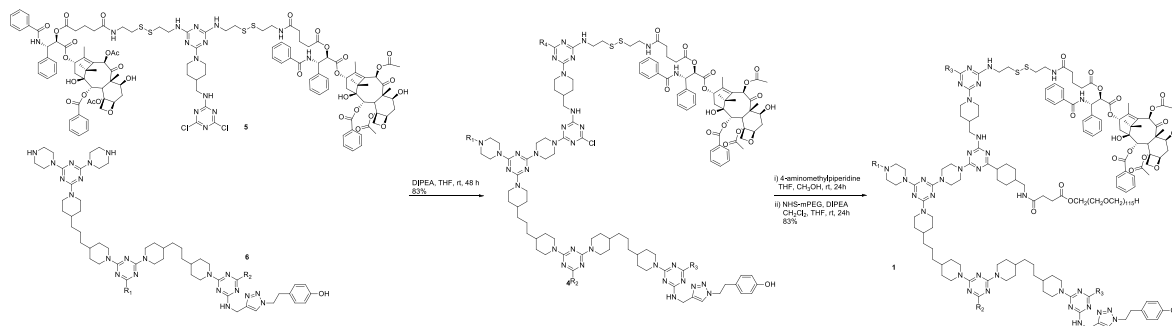

Compound **1**. To a solution of **4** (225 mg, 0.01 mmol) in chloroform (10 mL), THF (1.5 mL), and methanol (0.2 mL), a solution of 4-aminomethylpiperidine (0.12 mL, 1.58 mmol) in THF (4 mL) was added via dropping funnel over 20 min and the solution was stirred for 24 h at room temperature. The solution was washed two times with brine, dried over  $\text{MgSO}_4$  and then the volume was reduced to 10 mL in vacuo. After addition of a solution of NHS-mPEG (CS type, MW 5 KDa, 555 mg, 0.11 mmol) and DIPEA (77 mg, 0.59 mmol) in dichloromethane (5 mL), the solution was stirred at room temperature for 24 h. After concentrated in vacuo, the residue was dissolved in deionized water and filtered. The resulting solution was diafiltered to remove low molecular weight impurities using Amicon stirring ultrafiltration cell equipment and a YM 10 membrane (MWCO: 10 KDa) in deionized water. The purified solution was concentrated to afford dendrimer **1** (521 mg, 83%).  $^1\text{H}$  NMR ( $\text{CDCl}_3$ , 300 MHz):  $^1\text{H}$  NMR (300 MHz,  $\text{CDCl}_3+\text{MeOH}-d_4$ ):  $\delta$  8.04 (d,  $J = 6.3$ , 32H, i), 7.70 (d,  $J = 7.2$ , 32H, c), 7.64-7.22 (m, 176H, a, b, d, e, f, g, h), 6.80 (d,  $J = 7.5$ , 2H, v''), 6.71 (br s, 1H, q''), 6.61 (d,  $J = 6.0$ , 2H, u''), 6.30 (s, 16H, y), 6.06 (br, 16H, n), 5.84 (br, 16H, l), 5.60 (br, 16H, q), 5.35 (br, 16H, m), 4.91 (d,  $J = 8.7$ , 16H, u), 4.62 (br, 18H, h<sub>e</sub>''), 4.48-4.14 (m, 72H, w, t, b<sub>e</sub>''), 3.82-3.64 (m, 82H, a'', r'', r, g'), 3.80-3.30 (mPEG), 3.34-3.24 (m, 48H, j', k''), 3.00 (br s, 18H, h<sub>a</sub>'', s''), 2.76-2.58 (m, 96H, a''', h', i'), 2.50-2.34 (m, 72H, b<sub>a</sub>'', d', f', v), 2.33 (s, 48H, j), 2.31-2.08 (m, 64H, d', f', o), 2.11 (s, 48H, k), 2.08-1.78 (m, 88H, c<sub>e</sub>'', e', i<sub>e</sub>'', v), 1.87 (s, 48H, z), 1.75-0.73 (m, 96H, d'', c<sub>a</sub>'', g'', j'', i<sub>a</sub>'', e'', f''), 1.64 (s, 48H, c'), 1.09 (s, 48H, b'), 1.07 (s, 48H, a'); MS (MALDI-TOF) calcd for complete PEGylation 63300, found 61100.

**Figure S1. Mass spectrum of 1.** Pegylation of **4** with 5kDa PEG broadens the spectrum of **1** in comparison to the starting material. The peak centered at 61kDa appears close to the theoretical expectation.

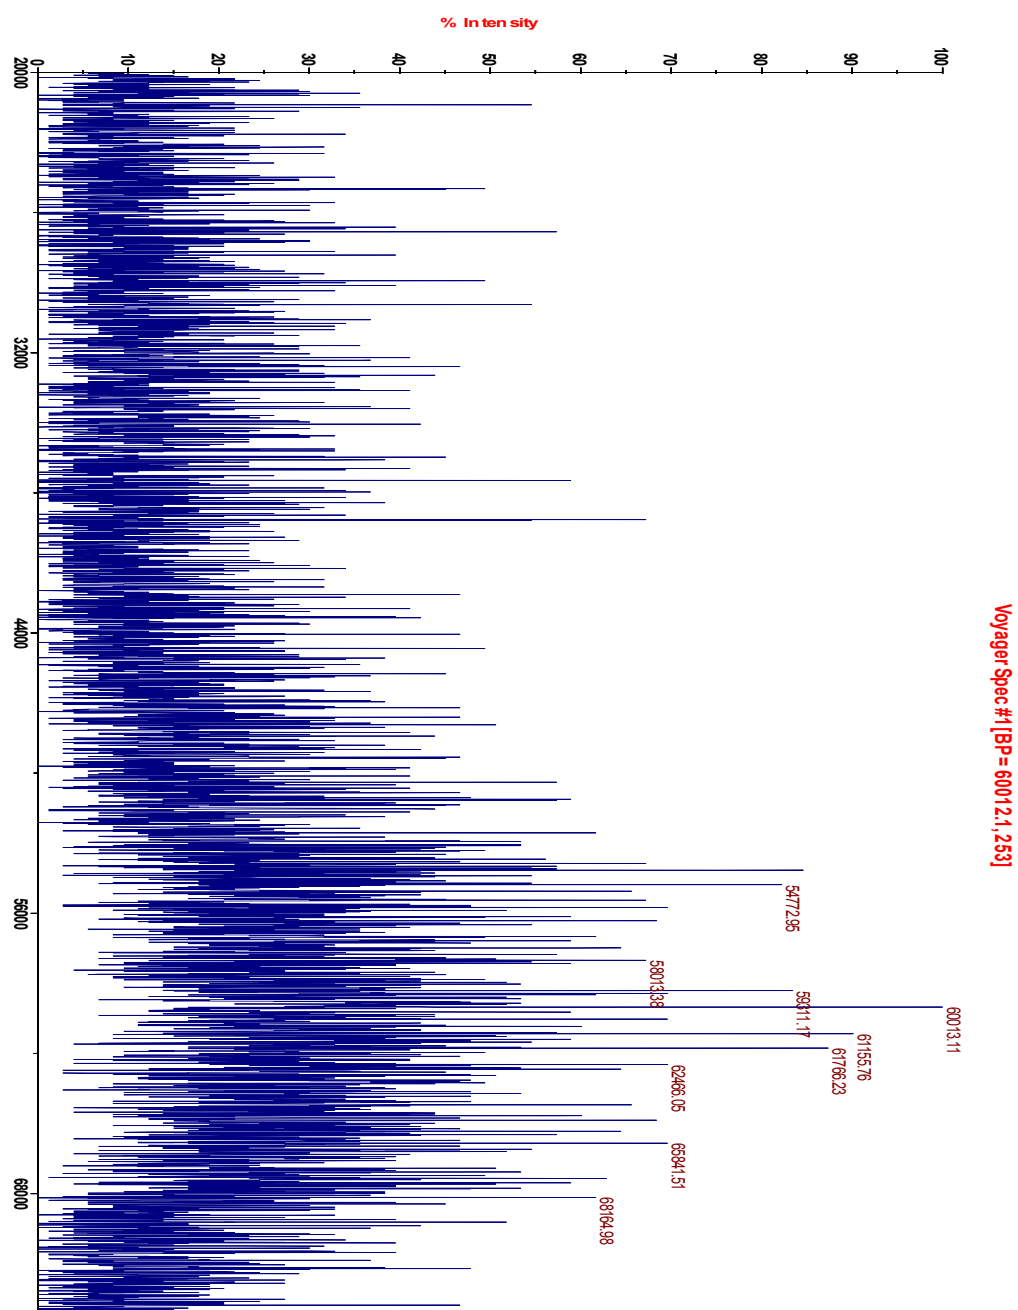

**Figure S2.** HPLC traces of **1**. For analytic HPLC of the dendrimers, a ZORBAX 300SB-C8 column (1.0 x 150 mm, 3.5m) was used with a gradient elution: 65% A to 20% A over 20 min and then keep 30% A (A = water with 0.1% TFA, B = acetonitrile with 0.1% TFA) with a flow rate of 50  $\mu$ L/min. UV detection was performed at 227 nm. The two peaks are hypothesized to correspond to the target and one that is missing one PEG (perhaps due to incomplete reaction of monomer **4** and thus also missing 2 paclitaxels).

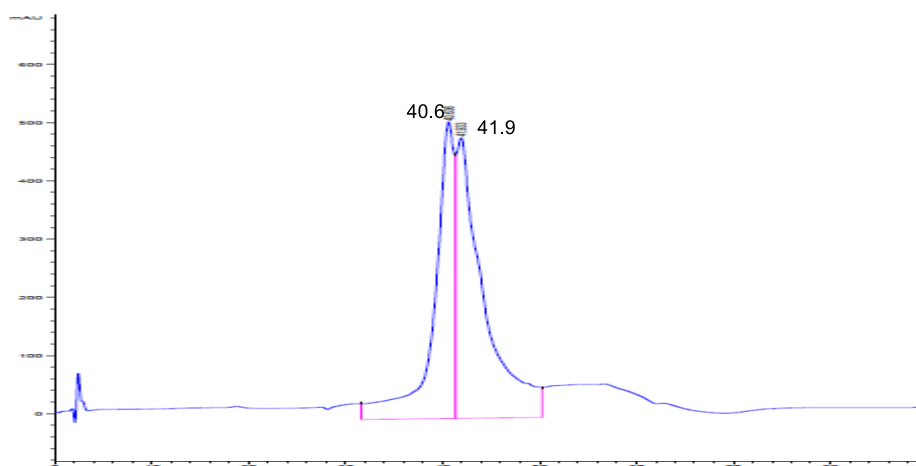

**Figure S3.** GPC traces of PEG 5K. The analytical GPC chromatogram obtained using 0.1 M  $\text{NaNO}_3$  (aq) as an eluent with a RI detector. This trace is useful for assessing the amount of free PEG in **1**.

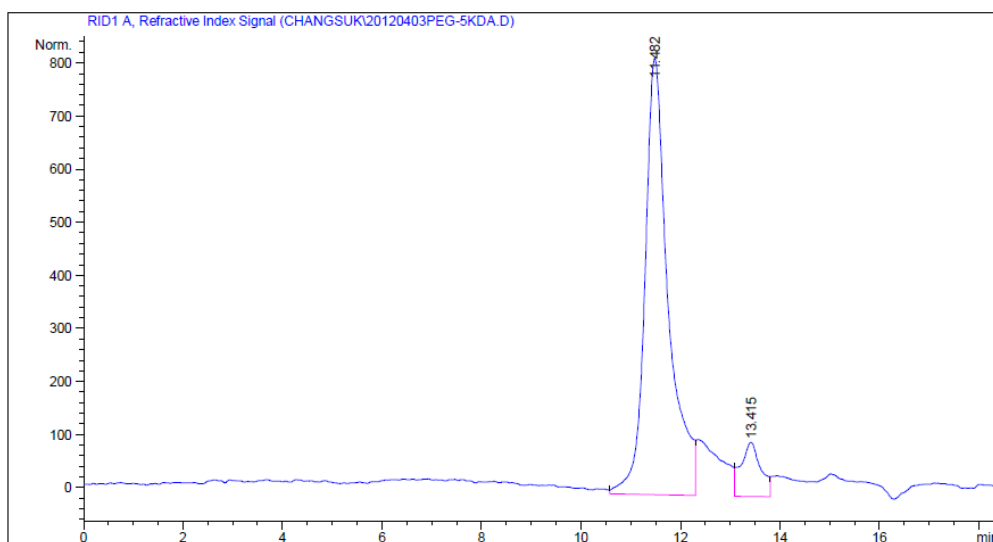

**Figure S4.** GPC traces of **1**. The analytical GPC chromatogram obtained using 0.1 M  $\text{NaNO}_3$  (aq) as an eluent with a RI detector. Dialysis removes a majority of the free PEG.

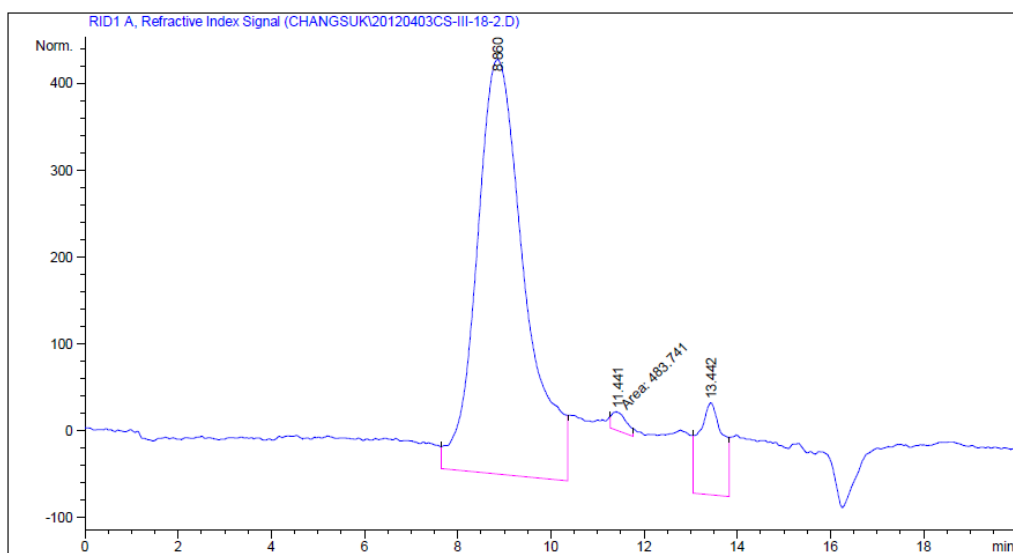

CS-113-28-M  
 040-10 run with 60000 before acquisition  
 Sample ID: 4\_20120411\_13  
 File: 4\_20120411\_13\data/cd04\_01.f16  
 Pulse Sequence: zgpg30  
 Solvent: cdcl3  
 Acquire Date: 04/11/2012  
 Operator: J. J. J.  
 Instrument: spect  
 P1: 12.00 sec  
 P2: 12.00 sec  
 P3: 12.00 sec  
 P4: 12.00 sec  
 P5: 12.00 sec  
 P6: 12.00 sec  
 P7: 12.00 sec  
 P8: 12.00 sec  
 P9: 12.00 sec  
 P10: 12.00 sec  
 P11: 12.00 sec  
 P12: 12.00 sec  
 P13: 12.00 sec  
 P14: 12.00 sec  
 P15: 12.00 sec  
 P16: 12.00 sec  
 P17: 12.00 sec  
 P18: 12.00 sec  
 P19: 12.00 sec  
 P20: 12.00 sec  
 P21: 12.00 sec  
 P22: 12.00 sec  
 P23: 12.00 sec  
 P24: 12.00 sec  
 P25: 12.00 sec  
 P26: 12.00 sec  
 P27: 12.00 sec  
 P28: 12.00 sec  
 P29: 12.00 sec  
 P30: 12.00 sec  
 P31: 12.00 sec  
 P32: 12.00 sec  
 P33: 12.00 sec  
 P34: 12.00 sec  
 P35: 12.00 sec  
 P36: 12.00 sec  
 P37: 12.00 sec  
 P38: 12.00 sec  
 P39: 12.00 sec  
 P40: 12.00 sec  
 P41: 12.00 sec  
 P42: 12.00 sec  
 P43: 12.00 sec  
 P44: 12.00 sec  
 P45: 12.00 sec  
 P46: 12.00 sec  
 P47: 12.00 sec  
 P48: 12.00 sec  
 P49: 12.00 sec  
 P50: 12.00 sec  
 P51: 12.00 sec  
 P52: 12.00 sec  
 P53: 12.00 sec  
 P54: 12.00 sec  
 P55: 12.00 sec  
 P56: 12.00 sec  
 P57: 12.00 sec  
 P58: 12.00 sec  
 P59: 12.00 sec  
 P60: 12.00 sec  
 P61: 12.00 sec  
 P62: 12.00 sec  
 P63: 12.00 sec  
 P64: 12.00 sec  
 P65: 12.00 sec  
 P66: 12.00 sec  
 P67: 12.00 sec  
 P68: 12.00 sec  
 P69: 12.00 sec  
 P70: 12.00 sec  
 P71: 12.00 sec  
 P72: 12.00 sec  
 P73: 12.00 sec  
 P74: 12.00 sec  
 P75: 12.00 sec  
 P76: 12.00 sec  
 P77: 12.00 sec  
 P78: 12.00 sec  
 P79: 12.00 sec  
 P80: 12.00 sec  
 P81: 12.00 sec  
 P82: 12.00 sec  
 P83: 12.00 sec  
 P84: 12.00 sec  
 P85: 12.00 sec  
 P86: 12.00 sec  
 P87: 12.00 sec  
 P88: 12.00 sec  
 P89: 12.00 sec  
 P90: 12.00 sec  
 P91: 12.00 sec  
 P92: 12.00 sec  
 P93: 12.00 sec  
 P94: 12.00 sec  
 P95: 12.00 sec  
 P96: 12.00 sec  
 P97: 12.00 sec  
 P98: 12.00 sec  
 P99: 12.00 sec  
 P100: 12.00 sec  
 P101: 12.00 sec  
 P102: 12.00 sec  
 P103: 12.00 sec  
 P104: 12.00 sec  
 P105: 12.00 sec  
 P106: 12.00 sec  
 P107: 12.00 sec  
 P108: 12.00 sec  
 P109: 12.00 sec  
 P110: 12.00 sec  
 P111: 12.00 sec  
 P112: 12.00 sec  
 P113: 12.00 sec  
 P114: 12.00 sec  
 P115: 12.00 sec  
 P116: 12.00 sec  
 P117: 12.00 sec  
 P118: 12.00 sec  
 P119: 12.00 sec  
 P120: 12.00 sec  
 P121: 12.00 sec  
 P122: 12.00 sec  
 P123: 12.00 sec  
 P124: 12.00 sec  
 P125: 12.00 sec  
 P126: 12.00 sec  
 P127: 12.00 sec  
 P128: 12.00 sec  
 P129: 12.00 sec  
 P130: 12.00 sec  
 P131: 12.00 sec  
 P132: 12.00 sec  
 P133: 12.00 sec  
 P134: 12.00 sec  
 P135: 12.00 sec  
 P136: 12.00 sec  
 P137: 12.00 sec  
 P138: 12.00 sec  
 P139: 12.00 sec  
 P140: 12.00 sec  
 P141: 12.00 sec  
 P142: 12.00 sec  
 P143: 12.00 sec  
 P144: 12.00 sec  
 P145: 12.00 sec  
 P146: 12.00 sec  
 P147: 12.00 sec  
 P148: 12.00 sec  
 P149: 12.00 sec  
 P150: 12.00 sec  
 P151: 12.00 sec  
 P152: 12.00 sec  
 P153: 12.00 sec  
 P154: 12.00 sec  
 P155: 12.00 sec  
 P156: 12.00 sec  
 P157: 12.00 sec  
 P158: 12.00 sec  
 P159: 12.00 sec  
 P160: 12.00 sec  
 P161: 12.00 sec  
 P162: 12.00 sec  
 P163: 12.00 sec  
 P164: 12.00 sec  
 P165: 12.00 sec  
 P166: 12.00 sec  
 P167: 12.00 sec  
 P168: 12.00 sec  
 P169: 12.00 sec  
 P170: 12.00 sec  
 P171: 12.00 sec  
 P172: 12.00 sec  
 P173: 12.00 sec  
 P174: 12.00 sec  
 P175: 12.00 sec  
 P176: 12.00 sec  
 P177: 12.00 sec  
 P178: 12.00 sec  
 P179: 12.00 sec  
 P180: 12.00 sec  
 P181: 12.00 sec  
 P182: 12.00 sec  
 P183: 12.00 sec  
 P184: 12.00 sec  
 P185: 12.00 sec  
 P186: 12.00 sec  
 P187: 12.00 sec  
 P188: 12.00 sec  
 P189: 12.00 sec  
 P190: 12.00 sec  
 P191: 12.00 sec  
 P192: 12.00 sec  
 P193: 12.00 sec  
 P194: 12.00 sec  
 P195: 12.00 sec  
 P196: 12.00 sec  
 P197: 12.00 sec  
 P198: 12.00 sec  
 P199: 12.00 sec  
 P200: 12.00 sec  
 P201: 12.00 sec  
 P202: 12.00 sec  
 P203: 12.00 sec  
 P204: 12.00 sec  
 P205: 12.00 sec  
 P206: 12.00 sec  
 P207: 12.00 sec  
 P208: 12.00 sec  
 P209: 12.00 sec  
 P210: 12.00 sec  
 P211: 12.00 sec  
 P212: 12.00 sec  
 P213: 12.00 sec  
 P214: 12.00 sec  
 P215: 12.00 sec  
 P216: 12.00 sec  
 P217: 12.00 sec  
 P218: 12.00 sec  
 P219: 12.00 sec  
 P220: 12.00 sec  
 P221: 12.00 sec  
 P222: 12.00 sec  
 P223: 12.00 sec  
 P224: 12.00 sec  
 P225: 12.00 sec  
 P226: 12.00 sec  
 P227: 12.00 sec  
 P228: 12.00 sec  
 P229: 12.00 sec  
 P230: 12.00 sec  
 P231: 12.00 sec  
 P232: 12.00 sec  
 P233: 12.00 sec  
 P234: 12.00 sec  
 P235: 12.00 sec  
 P236: 12.00 sec  
 P237: 12.00 sec  
 P238: 12.00 sec  
 P239: 12.00 sec  
 P240: 12.00 sec  
 P241: 12.00 sec  
 P242: 12.00 sec  
 P243: 12.00 sec  
 P244: 12.00 sec  
 P245: 12.00 sec  
 P246: 12.00 sec  
 P247: 12.00 sec  
 P248: 12.00 sec  
 P249: 12.00 sec  
 P250: 12.00 sec  
 P251: 12.00 sec  
 P252: 12.00 sec  
 P253: 12.00 sec  
 P254: 12.



**Figure S6. Expanded Region of 1.** Comparison of the integration of the phenolic group (6.6 and 6.8 ppm) and that of 16 theoretical paclitaxel groups.

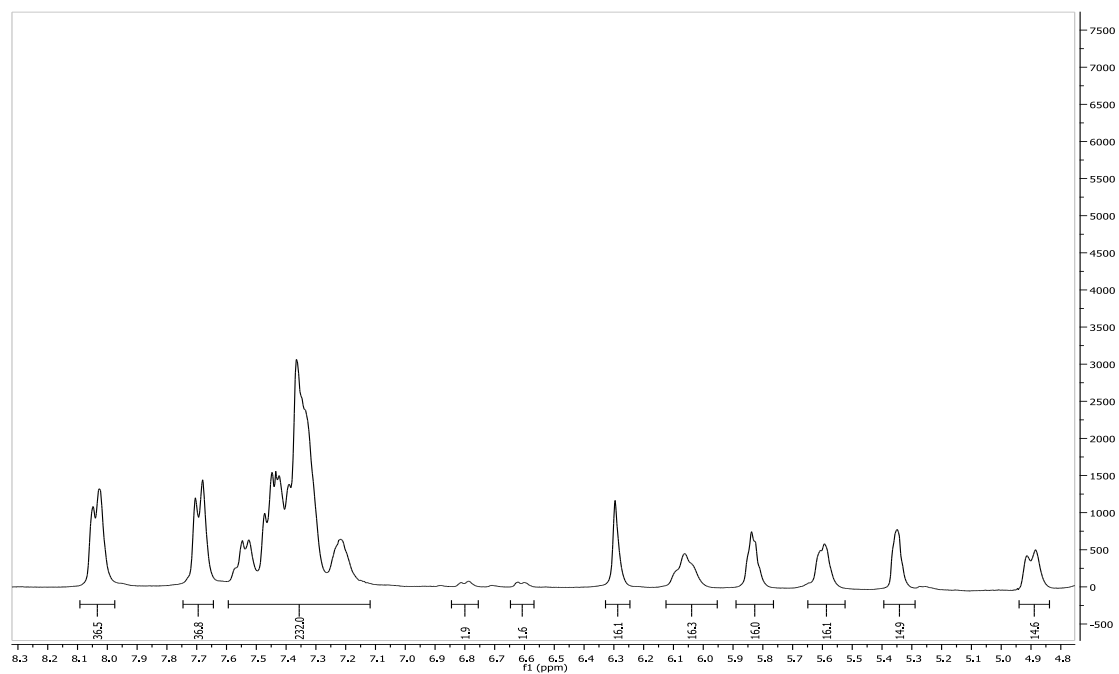

## Synthesis of 4

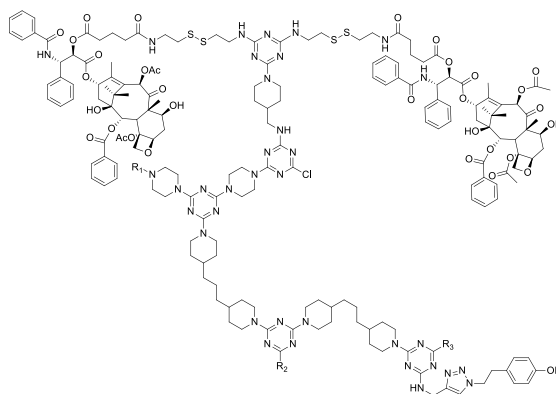

Compound **4**. To a solution of **5** (599 mg, 0.236 mmol) in THF (4 mL), a solution of G2 dendron (**6**) (680 mg, 0.284 mmol) and DIPEA (0.15 mL, 0.89 mmol) in THF (3 mL) and water (1 mL) was added via dropping funnel over 20 min at 0 °C. The solution was stirred for 48h at room temperature and evaporated under vacuum. The residue was dissolved in dichloromethane (20 mL) and washed two times with brine, dried over MgSO<sub>4</sub> and concentrated. The crude product was purified by column chromatography (EtOAc:DCM:MeOH = 10:10:0.3 → DCM:MeOH = 10:1; TLC R<sub>f</sub> = 0.23 with DCM:MeOH = 10:1) to give **4** as a solid (445 mg, 83 %). <sup>1</sup>H NMR (300 MHz, CDCl<sub>3</sub>+MeOH-d<sub>4</sub>): δ 8.14 (d, *J* = 6.9, 32H, i), 7.78 (d, *J* = 7.2, 32H, c), 7.64 (t, *J* = 7.2 Hz, 16H, g), 7.56-7.29 (m, 160H, a, b, d, e, f, h), 6.98(s, 1H, q''), 6.90 (d, *J* = 8.4, 2H, v''), 6.71 (d, *J* = 8.4, 2H, u''), 6.38 (s, 16H, y), 6.17 (t, *J* = 8.7, 16H, n), 5.95 (d, *J* = 3.9, 16H, l), 5.70 (d, *J* = 7.2, 16H, q), 5.46 (d, *J* = 4.2, 16H, m), 4.96 (d, *J* = 9.3, 16H, u), 4.72 (br s, 16H, h<sub>e</sub>''), 4.60 (br s, 2H, o''), 4.48-4.23 (m, 72H, w, t, b<sub>e</sub>''), 3.82 (br s, 50H, a'', r'', r), 3.64 (br s, 32H, g'), 3.57-3.31 (m, 48H, j', k''), 3.33 (br s, 16H, h<sub>a</sub>''), 3.07 (t, *J* = 6.6, 2H, s''), 2.85 (br s, 32H, a'''), 2.77 (br s, 64H, h', i'), 2.56-2.36 (m, 72H, b<sub>a</sub>'', d', f', v), 2.43 (s, 48H, j), 2.31-2.11 (m, 64H, d', f', o), 2.22 (s, 48H, k), 2.08-1.78 (m, 88H, c<sub>e</sub>'', e', i<sub>e</sub>'', v), 1.96 (s, 48H, z), 1.75-0.86 (m, 96H, d'', c<sub>a</sub>'', g'', j'', i<sub>a</sub>'', e'', f''), 1.69 (s, 48H, c'), 1.20 (s, 48H, b'), 1.17 (s, 48H, a'); <sup>13</sup>C NMR (75 MHz, CDCl<sub>3</sub>+MeOH-d<sub>4</sub>) δ = 205.7 (q'), 175.2(p'), 174.3(o'), 172.6(n'), 171.7(z'), 170.8(m'), 170.6(j'), 170.6(k'), 170.4(triazole-dendron), 168.3(l'), 167.1(z''), 166.9(triazole-dendron), 166.6(triazole-dendron), 165.5(y'), 143.4(r'), 138.5(g'), 135.6(g), 135.2(h'), 135.0(s'), 133.6(d), 131.8(i), 131.3(i'), 130.7(b), 130.3(a), 130.3(e), 130.3(h), 129.1(c), 128.6(f), 127.1(u''), 117.3(v''), 86.3(u), 82.8(s), 79.6(p), 78.2(t), 77.4(y), 76.7(q), 75.9(m), 73.7(n), 73.1(w),

59.9(x), 54.9(l), 47.7(r), 45.0(a''), 45.0(b''), 45.0(t'), 45.0 (k''), 41.2(x'), 39.9(u'), 39.5(v'), 39.0(w'), 38.6(e''), 38.1(d''), 37.7(o), 37.0(v), 36.4(f'), 34.5(d'), 34.0(c''), 31.8(i''), 31.3(j''), 31.3(s''), 28.1(b'), 25.5(f'), 24.2(j), 23.6(a'), 22.5(e'), 22.4(k), 16.1(z), 11.4(c'); MS (MALDI-TOF) calcd for  $C_{1134}H_{1474}Cl_8N_{165}O_{257}S_{32}$  (M+H)<sup>+</sup> 22716.80895, found 22842.

**Figure S7. Mass spectrum of 4.** The expected ion is observed (22842) with a ionization-induced fragmentation (hypothesis) of a paclitaxel group (21972) and evidence of incomplete reaction of monomer (20408), a target corresponding to 7 additions instead of 8, *or* an ionization-induced fragmentation (loss of 14). The mass difference between these choices is 250 a.m.u. While the difference is closer to a fragmentation, it is not possible for definitive assessment.

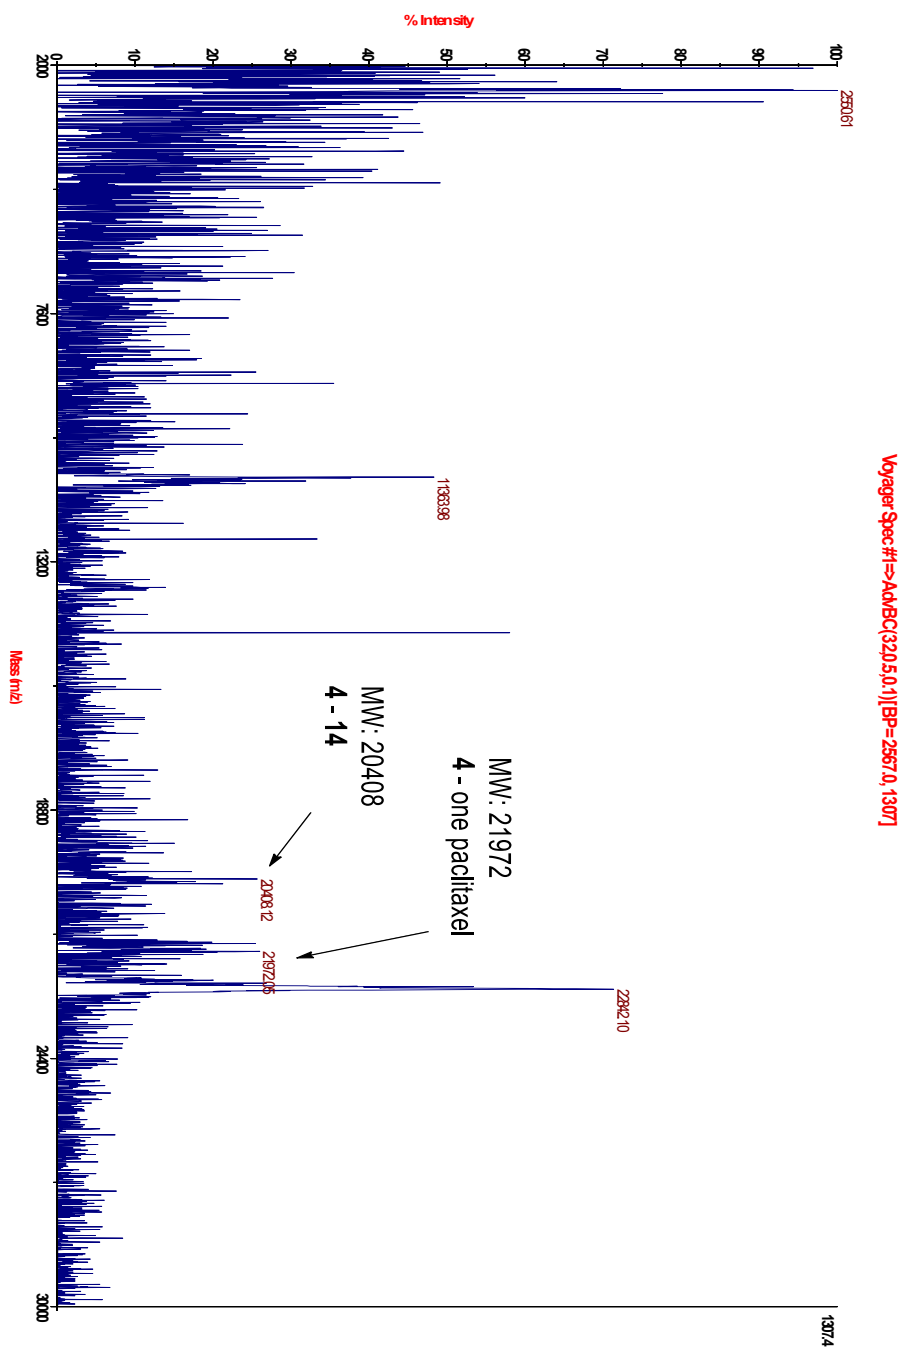

[illegible]

**Figure S9 Expanded Region of the  $^1\text{H}$  NMR of 4.** This region shows good agreement between the signals for the phenolic group at the core of the dendrimer (6.6 and 6.8 ppm) and the paclitaxel groups. The expected ratio is 2:16 for u'' and v'' with l, m, n, and q.

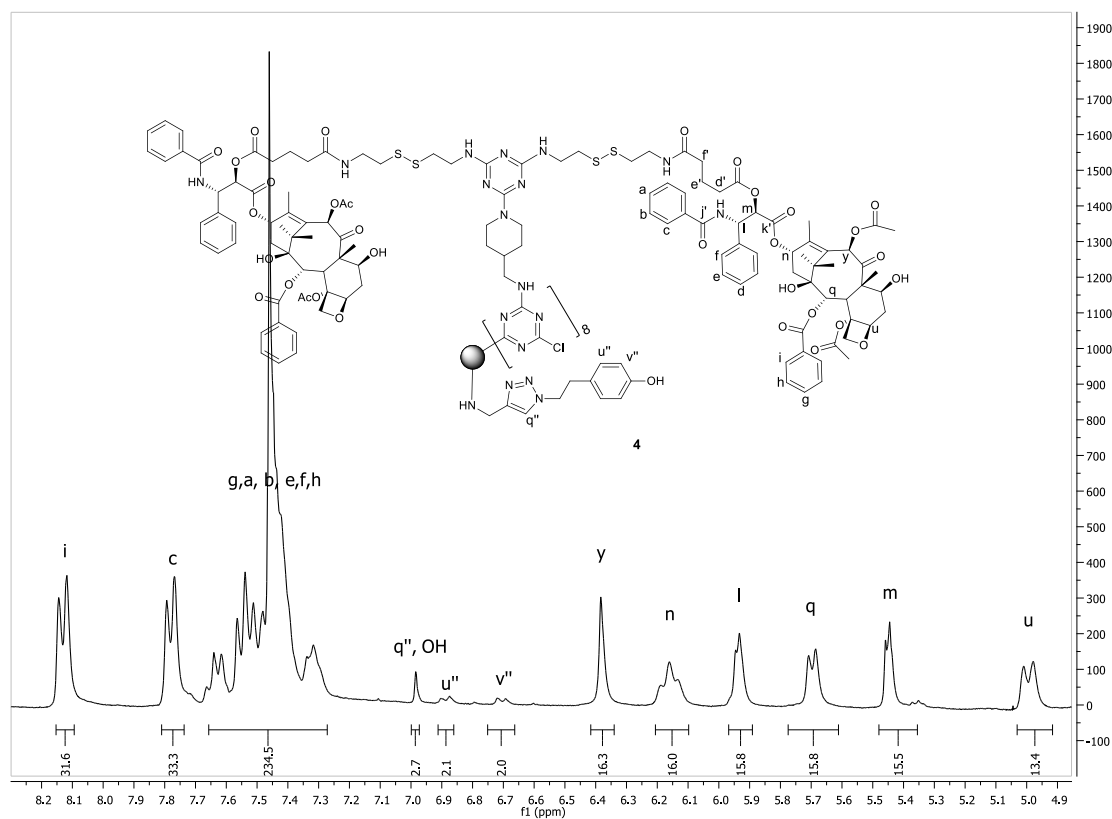

001-367X-4C1  
Acidative direct coupling / sample 8, 9, 10, 11, 12, 13, 14, 15, 16, 17, 18, 19, 20, 21, 22, 23, 24, 25, 26, 27, 28, 29, 30, 31, 32, 33, 34, 35, 36, 37, 38, 39, 40, 41, 42, 43, 44, 45, 46, 47, 48, 49, 50, 51, 52, 53, 54, 55, 56, 57, 58, 59, 60, 61, 62, 63, 64, 65, 66, 67, 68, 69, 70, 71, 72, 73, 74, 75, 76, 77, 78, 79, 80, 81, 82, 83, 84, 85, 86, 87, 88, 89, 90, 91, 92, 93, 94, 95, 96, 97, 98, 99, 100, 101, 102, 103, 104, 105, 106, 107, 108, 109, 110, 111, 112, 113, 114, 115, 116, 117, 118, 119, 120, 121, 122, 123, 124, 125, 126, 127, 128, 129, 130, 131, 132, 133, 134, 135, 136, 137, 138, 139, 140, 141, 142, 143, 144, 145, 146, 147, 148, 149, 150, 151, 152, 153, 154, 155, 156, 157, 158, 159, 160, 161, 162, 163, 164, 165, 166, 167, 168, 169, 170, 171, 172, 173, 174, 175, 176, 177, 178, 179, 180, 181, 182, 183, 184, 185, 186, 187, 188, 189, 190, 191, 192, 193, 194, 195, 196, 197, 198, 199, 200, 201, 202, 203, 204, 205, 206, 207, 208, 209, 210, 211, 212, 213, 214, 215, 216, 217, 218, 219, 220, 221, 222, 223, 224, 225, 226, 227, 228, 229, 230, 231, 232, 233, 234, 235, 236, 237, 238, 239, 240, 241, 242, 243, 244, 245, 246, 247, 248, 249, 250, 251, 252, 253, 254, 255, 256, 257, 258, 259, 260, 261, 262, 263, 264, 265, 266, 267, 268, 269, 270, 271, 272, 273, 274, 275, 276, 277, 278, 279, 280, 281, 282, 283, 284, 285, 286, 287, 288, 289, 290, 291, 292, 293, 294, 295, 296, 297, 298, 299, 300, 301, 302, 303, 304, 305, 306, 307, 308, 309, 310, 311, 312, 313, 314, 315, 316, 317, 318, 319, 320, 321, 322, 323, 324, 325, 326, 327, 328, 329, 330, 331, 332, 333, 334, 335, 336, 337, 338, 339, 340, 341, 342, 343, 344, 345, 346, 347, 348, 349, 350, 351, 352, 353, 354, 355, 356, 357, 358, 359, 360, 361, 362, 363, 364, 365, 366, 367, 368, 369, 370, 371, 372, 373, 374, 375, 376, 377, 378, 379, 380, 381, 382, 383, 384, 385, 386, 387, 388, 389, 390, 391, 392, 393, 394, 395, 396, 397, 398, 399, 400, 401, 402, 403, 404, 405, 406, 407, 408, 409, 410, 411, 412, 413, 414, 415, 416, 417, 418, 419, 420, 421, 422, 423, 424, 425, 426, 427, 428, 429, 430, 431, 432, 433, 434, 435, 436, 437, 438, 439, 440, 441, 442, 443, 444, 445, 446, 447, 448, 449, 450, 451, 452, 453, 454, 455, 456, 457, 458, 459, 460, 461, 462, 463, 464, 465, 466, 467, 468, 469, 470, 471, 472, 473, 474, 475, 476, 477, 478, 479, 480, 481, 482, 483, 484, 485, 486, 487, 488, 489, 490, 491, 492, 493, 494, 495, 496, 497, 498, 499, 500, 501, 502, 503, 504, 505, 506, 507, 508, 509, 510, 511, 512, 513, 514, 515, 516, 517, 518, 519, 520, 521, 522, 523, 524, 525, 526, 527, 528, 529, 530, 531, 532, 533, 534, 535, 536, 537, 538, 539, 540, 541, 542, 543, 544, 545, 546, 547, 548, 549, 550, 551, 552, 553, 554, 555, 556, 557, 558, 559, 560, 561, 562, 563, 564, 565, 566, 567, 568, 569, 570, 571, 572, 573, 574, 575, 576, 577, 578, 579, 580, 581, 582, 583, 584, 585, 586, 587, 588, 589, 590, 591, 592, 593, 594, 595, 596, 597, 598, 599, 600, 601, 602, 603, 604, 605, 606, 607, 608, 609, 610, 611, 612, 613, 614, 615, 616, 617, 618, 619, 620, 621, 622, 623, 624, 625, 626, 627, 628, 629, 630, 631, 632, 633, 634, 635, 636, 637, 638, 639, 640, 641, 642, 643, 644, 645, 646, 647, 648, 649, 650, 651, 652, 653, 654, 655, 656, 657, 658, 659, 660, 661, 662, 663, 664, 665, 666, 667, 668, 669, 670, 671, 672, 673, 674, 675, 676, 677, 678, 679, 680, 681, 682, 683, 684, 685, 686, 687, 688, 689, 690, 691, 692, 693, 694, 695, 696, 697, 698, 699, 700, 701, 702, 703, 704, 705, 706, 707, 708, 709, 710, 711, 712, 713, 714, 715, 716, 717, 718, 719, 720, 721, 722, 723, 724, 725, 726, 727, 728, 729, 730, 731, 732, 733, 734, 735, 736, 737, 738, 739, 740, 741, 742, 743, 744, 745, 746, 747, 748, 749, 750, 751, 752, 753, 754, 755, 756, 757, 758, 759, 760, 761, 762, 763, 764, 765, 766, 767, 768, 769, 770, 771, 772, 773, 774, 775, 776, 777, 778, 779, 780, 781, 782, 783, 784, 785, 786, 787, 788, 789, 790, 791, 792, 793, 794, 795, 796, 797, 798, 799, 800, 801, 802, 803, 804, 805, 806, 807, 808, 809, 810, 811, 812, 813, 814, 815, 816, 817, 818, 819, 820, 821, 822, 823, 824, 825, 826, 827, 828, 829, 830, 831, 832, 833, 834, 835, 836, 837, 838, 839, 840, 8

## Synthesis of Dichlorotriazine 5

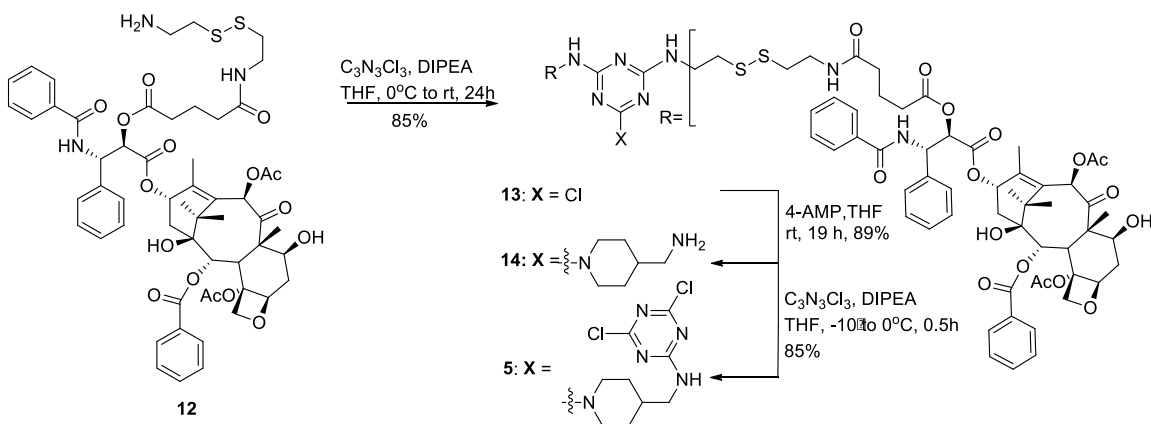

Dichlorotriazine **5**. To a solution of cyanuric chloride (79 mg, 0.426 mmol) in THF (5 mL), a solution of paclitaxel-AMP (**14**) (680 mg, 0.284 mmol) and DIPEA (0.15 mL, 0.852 mmol) in THF (15 mL) was added via drooping funnel over 20 min at  $-10^\circ C$ . The solution was stirred for 30 min at  $0^\circ C$  and quenched with water. The solution was diluted with dichloromethane (30 mL) and washed three times with brine, dried over  $MgSO_4$  and concentrated. The crude product was purified by column chromatography (DCM:MeOH = 19:1; TLC  $R_f$  = 0.29 with DCM:MeOH = 19:1) to give **5** as a foam (613 mg, 85 %).  $^1H$  NMR (300 MHz,  $CDCl_3$ ):  $\delta$  8.13 (d,  $J$  = 7.5, 4H, i), 7.77 (d,  $J$  = 7.5, 4H, c), 7.60 (t,  $J$  = 6.9 Hz, 2H, g), 7.52-7.27 (m, 20H, a, b, d, e, f, h), 6.31 (s, 2H, y), 6.28 (br s, 2H, n), 6.00 (d,  $J$  = 4.5, 2H, l), 5.68 (d,  $J$  = 6.6, 2H, q), 5.51 (br s, 2H, m), 4.96 (d,  $J$  = 9.3, 2H, u), 4.71 (br s, 2H,  $h_e''$ ), 4.43 (t,  $J$  = 8.1, 2H, w), 4.29 (d,  $J$  = 8.1, 2H, t), 4.19 (d,  $J$  = 8.4, 2H, t), 3.81 (d,  $J$  = 6.3, 2H, r), 3.57-3.31 (m, 10H,  $g'$ ,  $j'$ ,  $k''$ ), 2.96 (br s, 2H,  $h_a''$ ), 2.89-2.74 (m, 8H,  $h'$ ,  $i'$ ), 2.56-2.36 (m, 6H,  $d'$ ,  $f'$ , v), 2.46 (s, 6H, j), 2.31-2.11 (m, 8H,  $d'$ ,  $f'$ , o), 2.22 (s, 6H, k), 2.08-1.78 (m, 8H,  $e'$ ,  $i_e''$ , v), 1.96 (s, 6H, z), 1.75-1.61 (m, 1H,  $j''$ ), 1.68 (s, 6H,  $c'$ ), 1.25- 1.13 (m, 2H,  $i_a''$ ), 1.22 (s, 6H,  $b'$ ), 1.13 (s, 6H,  $a'$ );  $^{13}C$  NMR (75 MHz,  $CDCl_3$ +MeOH- $d_4$ )  $\delta$  = 205.2 ( $q'$ ), 174.8( $p'$ ), 173.8( $o'$ ), 172.0( $n'$ ), 171.3( $z'$ ), 170.4( $m'$ ), 170.3( $j'$ ), 170.3( $k'$ ), 167.8( $l'$ ), 167.1( $z''$ ), 165.5( $y'$ ), 142.8( $r'$ ), 138.0( $g'$ ), 135.1( $g$ ), 134.8( $h'$ ), 134.5( $s'$ ), 133.1( $d$ ), 131.3( $i$ ), 130.9( $i'$ ), 130.2( $b$ ), 129.8( $a$ ), 129.7( $e$ ), 129.7( $h$ ), 128.6( $c$ ), 128.2( $f$ ), 85.9( $u$ ), 82.3( $s$ ), 79.1( $p$ ), 77.7( $t$ ), 76.9( $y$ ), 76.2( $q$ ), 75.5( $m$ ), 73.2( $n$ ),



72.5(w), 59.4(x), 54.6(l), 47.7 (h''), 47.3(r), 44.5 (k''), 44.2(t'), 40.8(x'), 39.5(u'), 39.0(v'), 38.5(w'), 37.2(o), 36.5(v), 35.9(f'), 34.0(d'), 30.8(i''), 27.6(j''), 26.7(b'), 23.7(j), 23.0(a'), 22.0(e'), 21.9(k), 15.6(z), 10.9(c'); HRMS (ESI) calcd for  $C_{124}H_{145}Cl_2N_{14}O_{32}S_4$  2539.84092, found 2539.7546 (M+H)<sup>+</sup>.

**Figure S11. Mass spectrum of 5.** The line at 1270 corresponds to the doubly-charged product. The line at 1721 is not identified and does not correspond to loss of paclitaxel (853 amu) or cleavage at the ester bond.

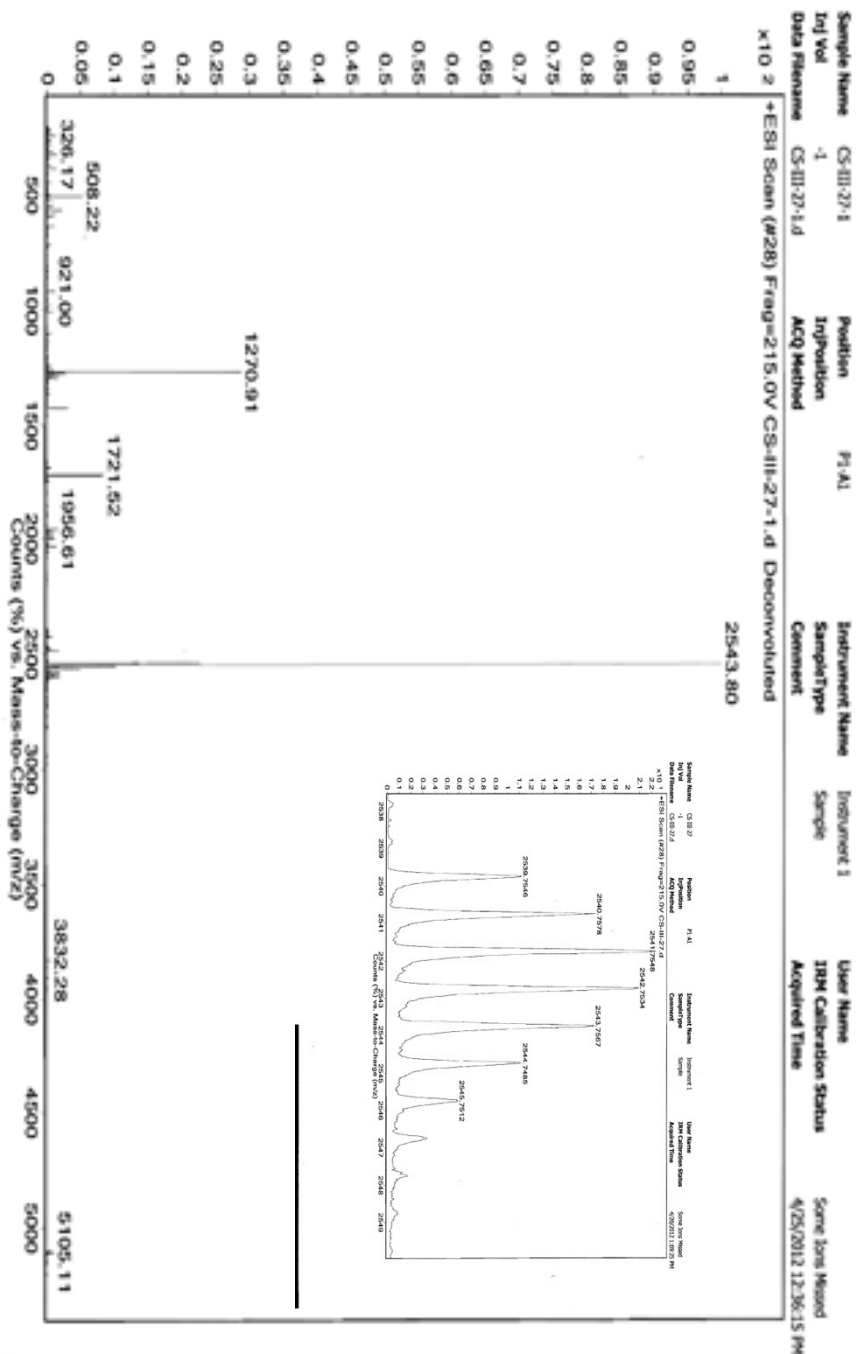

[illegible]

05-11-07-013  
17-75-000-012

part-16 run with 10000 before acquisition  
part-16 run with 10000 before acquisition  
Sample ID: 6-29120422\_02  
File: N\_29120422\_02\data\cd\06\_01\_016

Pulse Sequence: zgpg30  
Do I want to edit the pulse sequence?  
Answer: YES  
Operator: TOCHEN  
File: 06\_01\_016  
Date: 06/01/07

Acquire: delay 2.000 sec  
Pulse: 45.0 degrees  
Acq: time 2.261 sec  
Width: 10000 Hz  
Freq: 400.146 MHz  
Observed: 613.75, 446.911 MHz  
PROBHD: 1H, 200, 4000276 MM2  
Power: 35 dB  
SFO: 400.146 MHz  
NUC1: 13C  
DATA PROCESSING  
F2: 100.625 MHz  
Total time 21 hr, 35 min, 55 sec

Chemical structure of a complex molecule, likely a natural product or pharmaceutical, is shown. The structure features a central polycyclic core with various functional groups, including hydroxyl, carbonyl, and ether linkages. It is substituted with a benzoyl group, a 1,3,5-triazole ring, and a 4-iodophenyl group. Numerous atoms are labeled with letters (a, b, c, d, e, f, g, h, i, j, k, l, m, n, o, p, q, r, s, t, u, v, w, x, y, z, aa, ab, ac, ad, ae, af, ag, ah, ai, aj, ak, al, am, an, ao, ap, aq, ar, as, at, au, av, aw, ax, ay, az, ba, bb, bc, bd, be, bf, bg, bh, bi, bj, bk, bl, bm, bn, bo, bp, bq, br, bs, bt, bu, bv, bw, bx, by, bz, ca, cb, cc, cd, ce, cf, cg, ch, ci, cj, ck, cl, cm, cn, co, cp, cq, cr, cs, ct, cu, cv, cw, cx, cy, cz, da, db, dc, dd, de, df, dg, dh, di, dj, dk, dl, dm, dn, do, dp, dq, dr, ds, dt, du, dv, dw, dx, dy, dz, ea, eb, ec, ed, ee, ef, eg, eh, ei, ej, ek, el, em, en, eo, ep, eq, er, es, et, eu, ev, ew, ex, ey, ez, fa, fb, fc, fd, fe, ff, fg, fh, fi, fj, fk, fl, fm, fn, fo, fp, fq, fr, fs, ft, fu, fv, fw, fx, fy, fz, ga, gb, gc, gd, ge, gf, gh, gi, gj, gk, gl, gm, gn, go, gp, gq, gr, gs, gt, gu, gv, gw, gx, gy, gz, ha, hb, hc, hd, he, hf, hg, hh, hi, hj, hk, hl, hm, hn, ho, hp, hq, hr, hs, ht, hu, hv, hw, hx, hy, hz, ia, ib, ic, id, ie, if, ig, ih, ii, ij, ik, il, im, in, io, ip, iq, ir, is, it, iu, iv, iw, ix, iy, iz, ja, jb, jc, jd, je, jf, jg, jh, ji, jj, jk, jl, jm, jn, jo, jp, jq, jr, js, jt, ju, jv, jw, jx, jy, jz, ka, kb, kc, kd, ke, kf, kg, kh, ki, kj, kl, km, kn, ko, kp, kq, kr, ks, kt, ku, kv, kw, kx, ky, kz, la, lb, lc, ld, le, lf, lg, lh, li, lj, lk, ll, lm, ln, lo, lp, lq, lr, ls, lt, lu, lv, lw, lx, ly, lz, ma, mb, mc, md, me, mf, mg, mh, mi, mj, mk, ml, mm, mn, mo, mp, mq, mr, ms, mt, mu, mv, mw, mx, my, mz, na, nb, nc, nd, ne, nf, ng, nh, ni, nj, nk, nl, nm, no, np, nq, nr, ns, nt, nu, nv, nw, nx, ny, nz, oa, ob, oc, od, oe, of, og, oh, oi, oj, ok, ol, om, on, oo, op, oq, or, os, ot, ou, ov, ow, ox, oy, oz, pa, pb, pc, pd, pe, pf, pg, ph, pi, pj, pk, pl, pm, pn, po, pp, pq, pr, ps, pt, pu, pv, pw, px, py, pz, qa, qb, qc, qd, qe, qf, qg, qh, qi, qj, qk, ql, qm, qn, qo, qp, qq, qr, qs, qt, qu, qv, qw, qx, qy, qz, ra, rb, rc, rd, re, rf, rg, rh, ri, rj, rk, rl, rm, rn, ro, rp, rq, rr, rs, rt, ru, rv, rw, rx, ry, rz, sa, sb, sc, sd, se, sf, sg, sh, si, sj, sk, sl, sm, sn, so, sp, sq, sr, ss, st, su, sv, sw, sx, sy, sz, ta, tb, tc, td, te, tf, tg, th, ti, tj, tk, tl, tm, tn, to, tp, tq, tr, ts, tt, tu, tv, tw, tx, ty, tz, ua, ub, uc, ud, ue, uf, ug, uh, ui, uj, uk, ul, um, un, uo, up, uq, ur, us, ut, uu, uv, uw, ux, uy, uz, va, vb, vc, vd, ve, vf, vg, vh, vi, vj, vk, vl, vm, vn, vo, vp, vq, vr, vs, vt, vu, vv, vw, vx, vy, vz, wa, wb, wc, wd, we, wf, wg, wh, wi, wj, wk, wl, wm, wn, wo, wp, wq, wr, ws, wt, wu, wv, ww, wx, wy, wz, xa, xb, xc, xd, xe, xf, xg, xh, xi, xj, xk, xl, xm, xn, xo, xp, xq, xr, xs, xt, xu, xv, xw, xx, xy, xz, ya, yb, yc, yd, ye, yf, yg, yh, yi, yj, yk, yl, ym, yn, yo, yp, yq, yr, ys, yt, yu, yv, yw, yx, yy, yz, za, zb, zc, zd, ze, zf, zg, zh, zi, zj, zk, zl, zm, zn, zo, zp, zq, zr, zs, zt, zu, zv, zw, zx, zy, zz).

## Synthesis of 6

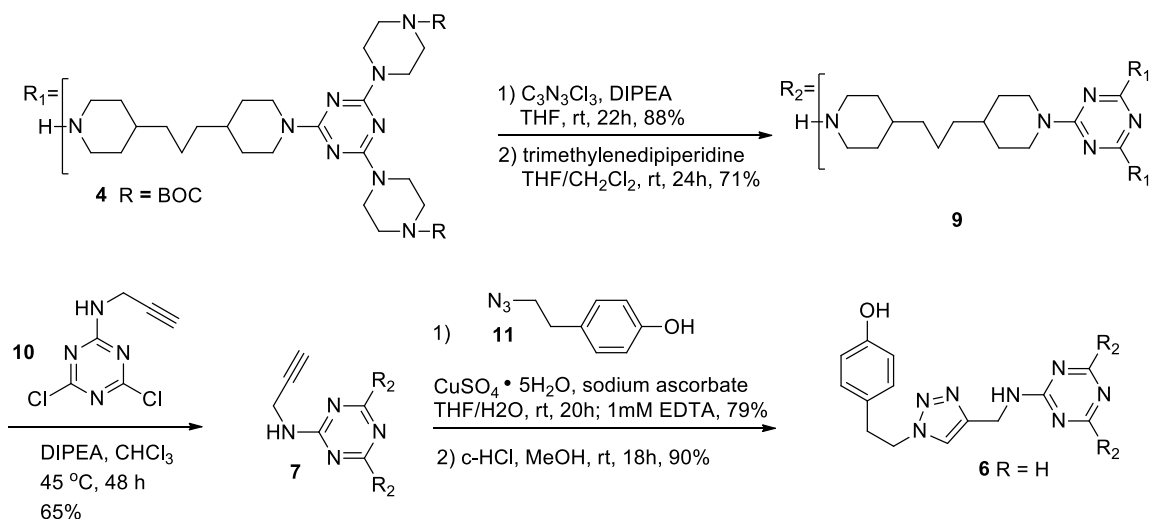

Dendrimer **6**. To a mixture of **S1** (171 mg, 0.049 mmol) methanol (4 mL), conc-HCl (12N, 2.5 mL) was slowly added at room temperature and stirred for 18h. The solution was diluted with dichloromethane (20 mL) and basified (pH = 14) with 5 M NaOH (aq) solution, and the resulting milky suspension was extracted with dichloromethane (5 x 20 mL). The organic extractions were combined, and then the solvent was removed *in vacuo* to afford the product **6** as a white solid (119 mg, 90%).  $^1H$  NMR (300 MHz,  $CDCl_3$ ):  $\delta$  7.34 (br s, 1H, q''), 6.89 (d,  $J$  = 8.1, 2H, v''), 6.70 (d,  $J$  = 8.1, 2H, u''), 4.68 (t,  $J$  = 12.0, 24H, b<sub>e</sub>''), 4.47 (t,  $J$  = 7.2, 2H, o''), 4.19 (br s, NH), 3.74 (br s, 32H, a''), 3.35 (br s, 2H, r''), 3.06 (t,  $J$  = 7.2, 2H, s''), 2.85 (br s, 32H, a'''), 2.73 (t,  $J$  = 12.3, 24H, b<sub>a</sub>''), 1.71 (d,  $J$  = 11.4, 24H, c<sub>e</sub>''), 1.79-0.94 (m, 72H, c<sub>a</sub>'', d'', e'', f'', g'')  $^{13}C$  NMR (75 MHz,  $CDCl_3$ +MeOH- $d_4$ )  $\delta$  167.7, 167.0, 166.9, 166.6, 166.3, 157.6(w''), 148.1(p''), 131.3(u''), 129.3(t''), 124.2(q''), 117.3(v''), 53.7(r''), 47.1(a''), 45.5(b''), 45.2(a'''), 38.5(e''), 38.0(d''), 37.6(s''), 33.9(c''), 23.5(f''); LRMS (ESI) calcd for  $C_{142}H_{230}N_{53}O$  2693.9576, found 2693.96 (M+H)<sup>+</sup>.

**Figure S14. Mass spectrum of 6.** The line at 1347 corresponds to doubly-charged 6.

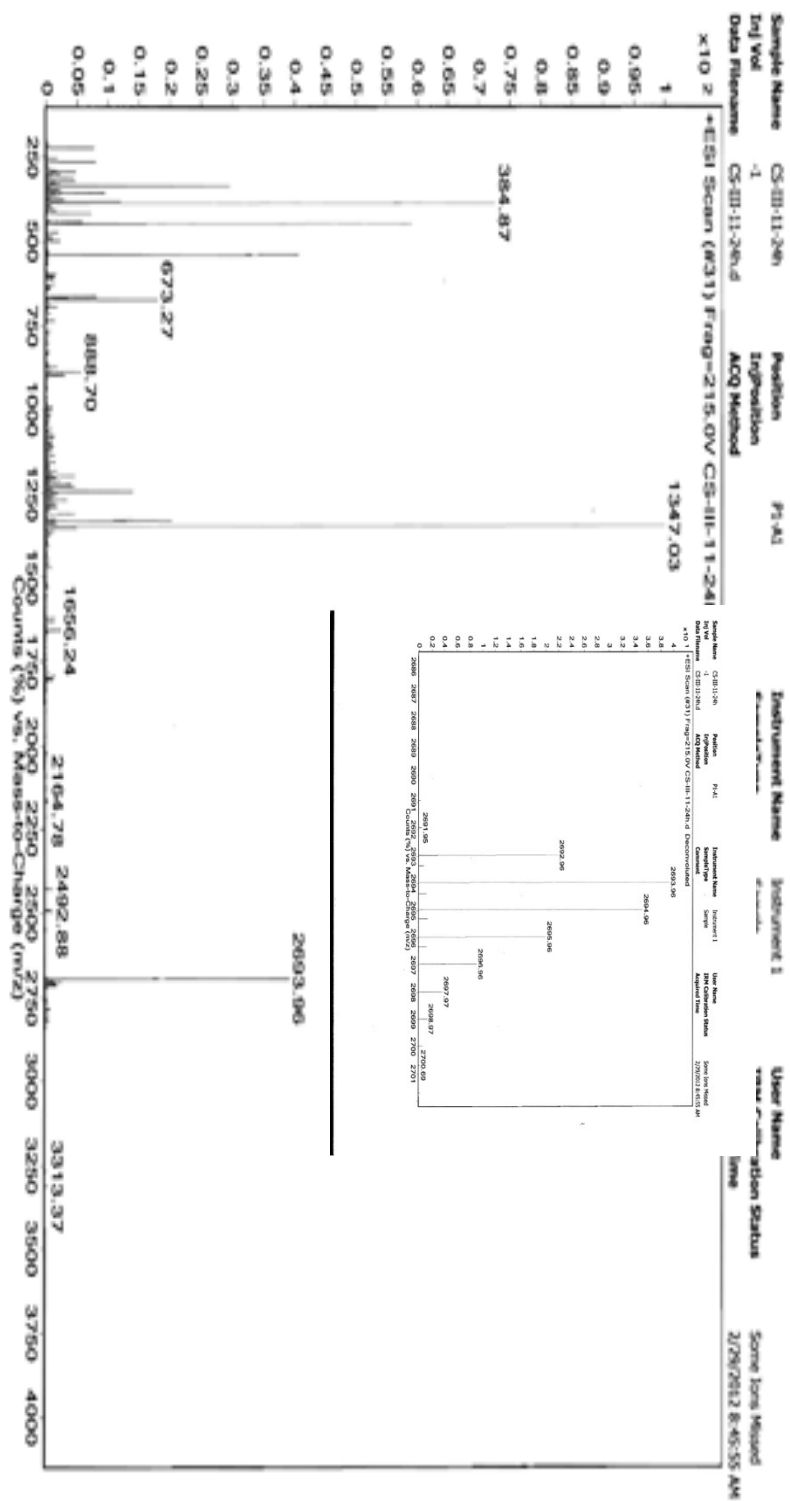

[illegible]

Figure S16.  $^{13}\text{C}$  NMR of 6.

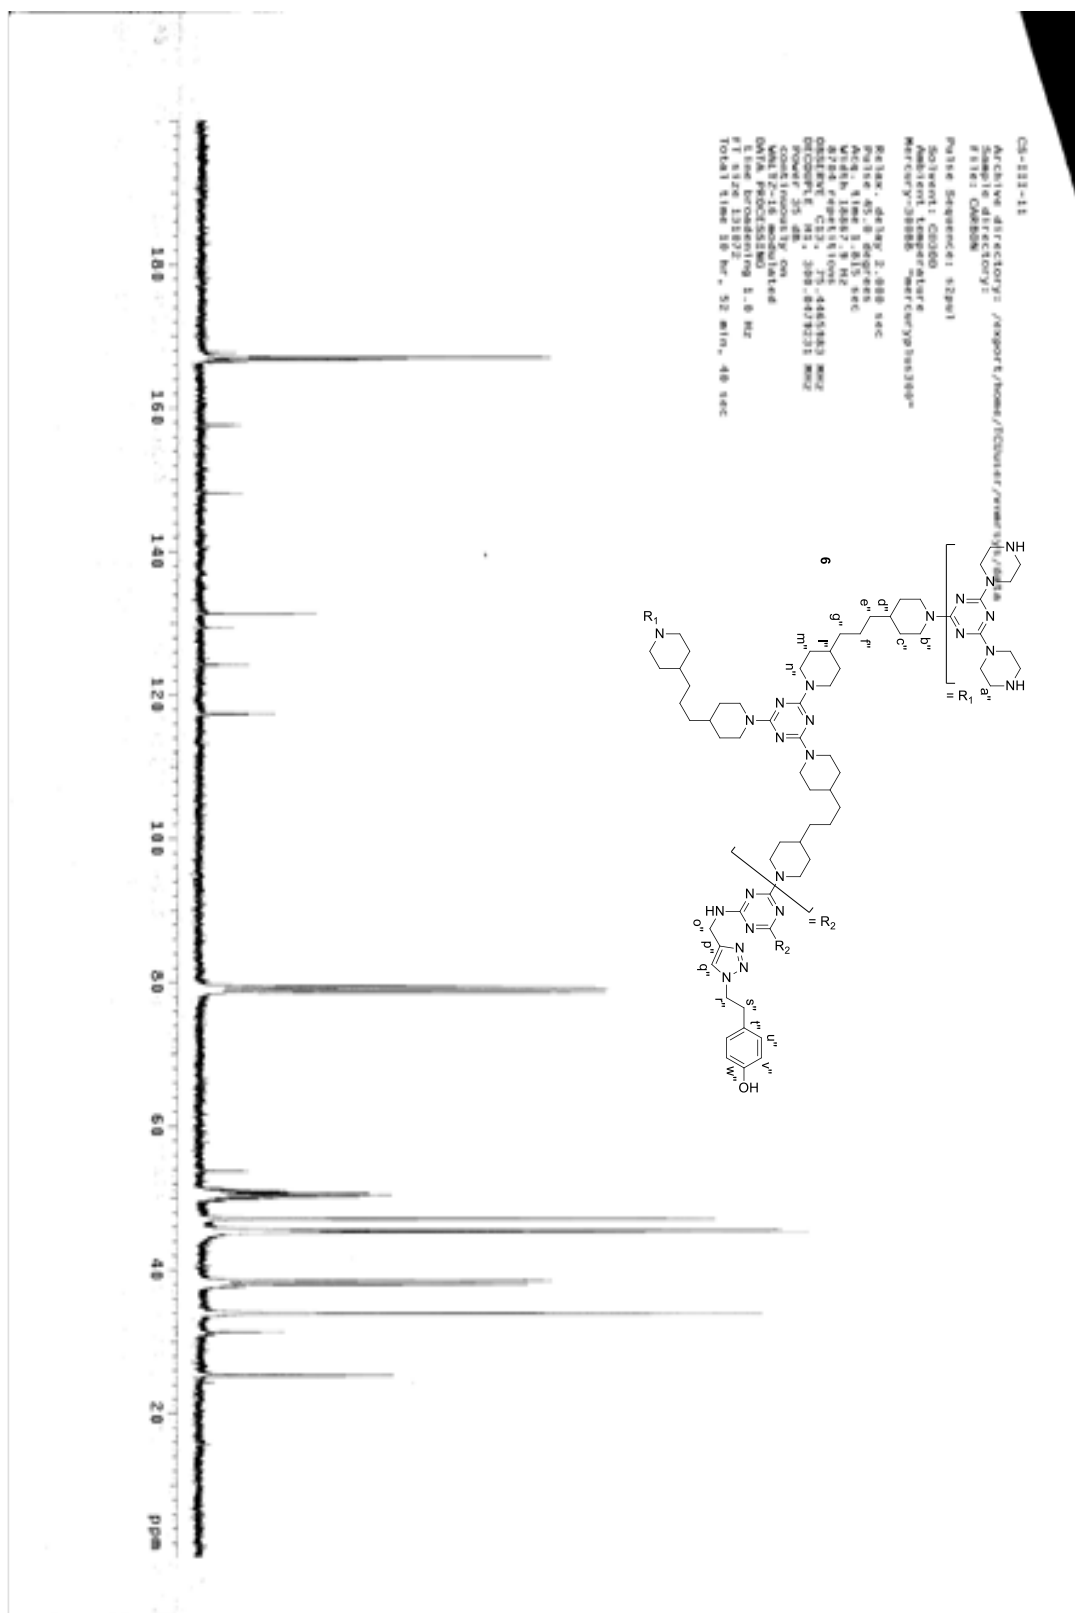



## Synthesis of S1

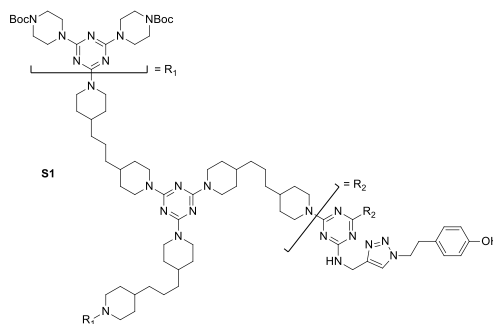

**Intermediate S1.** To a solution of **7** (149 mg, 0.045 mmol) and 4-(2-azidoethyl)phenol **11** (11 mg, 0.067 mmol) in THF (1 mL), a solution of  $\text{CuSO}_4 \cdot 5\text{H}_2\text{O}$  (2.2 mg, 0.01 mmol) in water (0.2 mL) followed by sodium-L-ascorbate (18 mg, 0.09) was added at room temperature and stirred for 20h. The solution was diluted with dichloromethane (20 mL) and washed three times with 1mM EDTA (20 mL), brine, dried over  $\text{MgSO}_4$  and concentrated. The crude product was purified by column chromatography (DCM:MeOH = 97:3  $\rightarrow$  DCM:MeOH = 92:8; TLC  $R_f$  = 0.33 with DCM:MeOH = 92:8) to give **S1** as a solid (124 mg, 79 %).  $^1\text{H}$  NMR (300 MHz,  $\text{CDCl}_3$ ):  $\delta$  7.06 (s, 1H, q''), 6.78 (d,  $J$  = 8.4, 2H, v''), 6.63 (d,  $J$  = 7.5, 2H, u''), 4.68 (br s, 24H, b<sub>e</sub>''), 4.43 (t,  $J$  = 6.9, 2H, o''), 3.72 (br s, 32H, a''), 3.34-3.18 (m, 2H, r''), 3.02 (t,  $J$  = 6.9, 2H, s''), 2.85 (br s, 32H, a'''), 2.73 (t,  $J$  = 11.7, 24H, b<sub>a</sub>''), 1.71 (d,  $J$  = 11.1, 24H, c<sub>e</sub>''), 1.79-0.94 (m, 72H, c<sub>a</sub>'', d'', e'', f'', g''), 1.46 (s, 72H, Boc)  $^{13}\text{C}$  NMR (75 MHz,  $\text{CDCl}_3$ )  $\delta$  165.4, 165.3, 164.9, 154.8(Boc), 129.6(u''), 122.7(q''), 116.3(v''), 79.8(Boc), 43.5(a''), 42.9(b''), 36.8(e''), 36.3(d''), 36.0(s''), 32.2(c''), 28.4(Boc), 23.5(f''); LRMS (ESI) calcd for  $\text{C}_{182}\text{H}_{294}\text{N}_{53}\text{O}_{17}$  3494.377, found 3494.35 ( $\text{M}+\text{H}$ )<sup>+</sup>.

| Sample Name                                                                                        | CS-II-81-pure   | Position   | FT-11 | Instrument Name | Instrument 1 | User Name              |
|----------------------------------------------------------------------------------------------------|-----------------|------------|-------|-----------------|--------------|------------------------|
| Inj Vol                                                                                            | -1              | Injection  |       | SampleType      | Sample       | IBM Calibration Status |
| Data Filename                                                                                      | CS-II-81-pure.d | Acq Method |       | Comment         | Click-Mode   | Acquired Time          |
| <p> <b>x10.2 +ESI Scan (m/z) Frag=215.0V CS-II-81-pure.d Deconvoluted</b><br/> <b>3495.35</b> </p> |                 |            |       |                 |              |                        |

| Sample Name                                                                                        | CS-II-81-pure   | Position   | FT-11 | Instrument Name | Instrument 1 | User Name              |
|----------------------------------------------------------------------------------------------------|-----------------|------------|-------|-----------------|--------------|------------------------|
| Inj Vol                                                                                            | -1              | Injection  |       | SampleType      | Sample       | IBM Calibration Status |
| Data Filename                                                                                      | CS-II-81-pure.d | Acq Method |       | Comment         | Click-Mode   | Acquired Time          |
| <p> <b>x10.2 +ESI Scan (m/z) Frag=215.0V CS-II-81-pure.d Deconvoluted</b><br/> <b>3495.35</b> </p> |                 |            |       |                 |              |                        |

[illegible]

[illegible]

### Synthesis of **7** with a Strategy to Remove Sideproduct **S2** by Conversion to **S3**

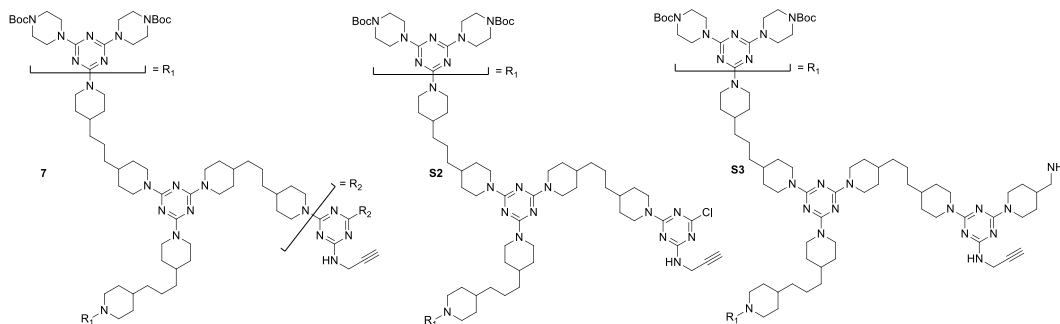

**Intermediate 7.** Compound **9** (716 mg, 0.447 mmol), dichlorotriazine **10** (22 mg, 0.112 mmol) and DIPEA (160  $\mu$ L, 0.89 mmol) were dissolved in  $\text{CHCl}_3$  (3 mL) at room temperature then warmed up 45  $^\circ\text{C}$  and stirred for 48h. The reaction mixture was dried under vacuo and an excess amount of compound **9** was recovered through column chromatography (DCM:MeOH = 19:1 $\rightarrow$ DCM:MeOH = 22:3). Semi-pure compound of **11** with a little amount of **S2** was further purified after addition of excess amount of aminomethylpiperidine (~100 equiv.) in THF (10 mL) at room temperature for 12h. Dendron **11** was isolated from **S3** by silica gel chromatography (DCM:MeOH = 19:1; TLC  $R_f$  = 0.31 with DCM:MeOH = 19:1) to give a white solid **7** (242 mg, 65%) in THF (10 mL) at room temperature for 12h.  $^1\text{H}$  NMR (300 MHz,  $\text{CDCl}_3$ ):  $\delta$  4.71 (d,  $J$  = 10.5, 24H,  $b_e''$ ), 4.18 (d,  $J$  = 10.5, 2H,  $o''$ ) 3.73 (s, 32H,  $a'''$ ), 3.43 (s, 32H,  $a''$ ), 2.71 (q,  $J$  = 11.4, 24H,  $b_a''$ ), 2.18 (br s, 1H,  $q''$ ), 1.68 (br s, 24H,  $C_e''$ ), 1.48 (s, 64H, Boc), 1.39-0.84 (m, 72H,  $C_a''$ ,  $d''$ ,  $e''$ ,  $f''$ );  $^{13}\text{C}$  NMR (75 MHz,  $\text{CDCl}_3$ )  $\delta$  165.4( $z''$ ), 165.3( $z'$ ), 164.9( $y'$ ), 154.8(Boc), 79.7(Boc), 43.5 ( $b''$ ), 42.9( $a''$ ), 36.8( $e''$ ), 36.3 ( $d''$ ), 32.2( $c''$ ), 28.4(Boc), 23.6( $f''$ ); LRMS (ESI) calcd for  $\text{C}_{174}\text{H}_{285}\text{N}_{50}\text{O}_{16}$  3331.30247, found 3331.30 ( $\text{M}+\text{H}$ ) $^+$

**Figure S20. Mass Spectrum of 7.** The trace shows loss of BOC and isobutylene as commonly observed and attributed to ionization-induced fragmentation.

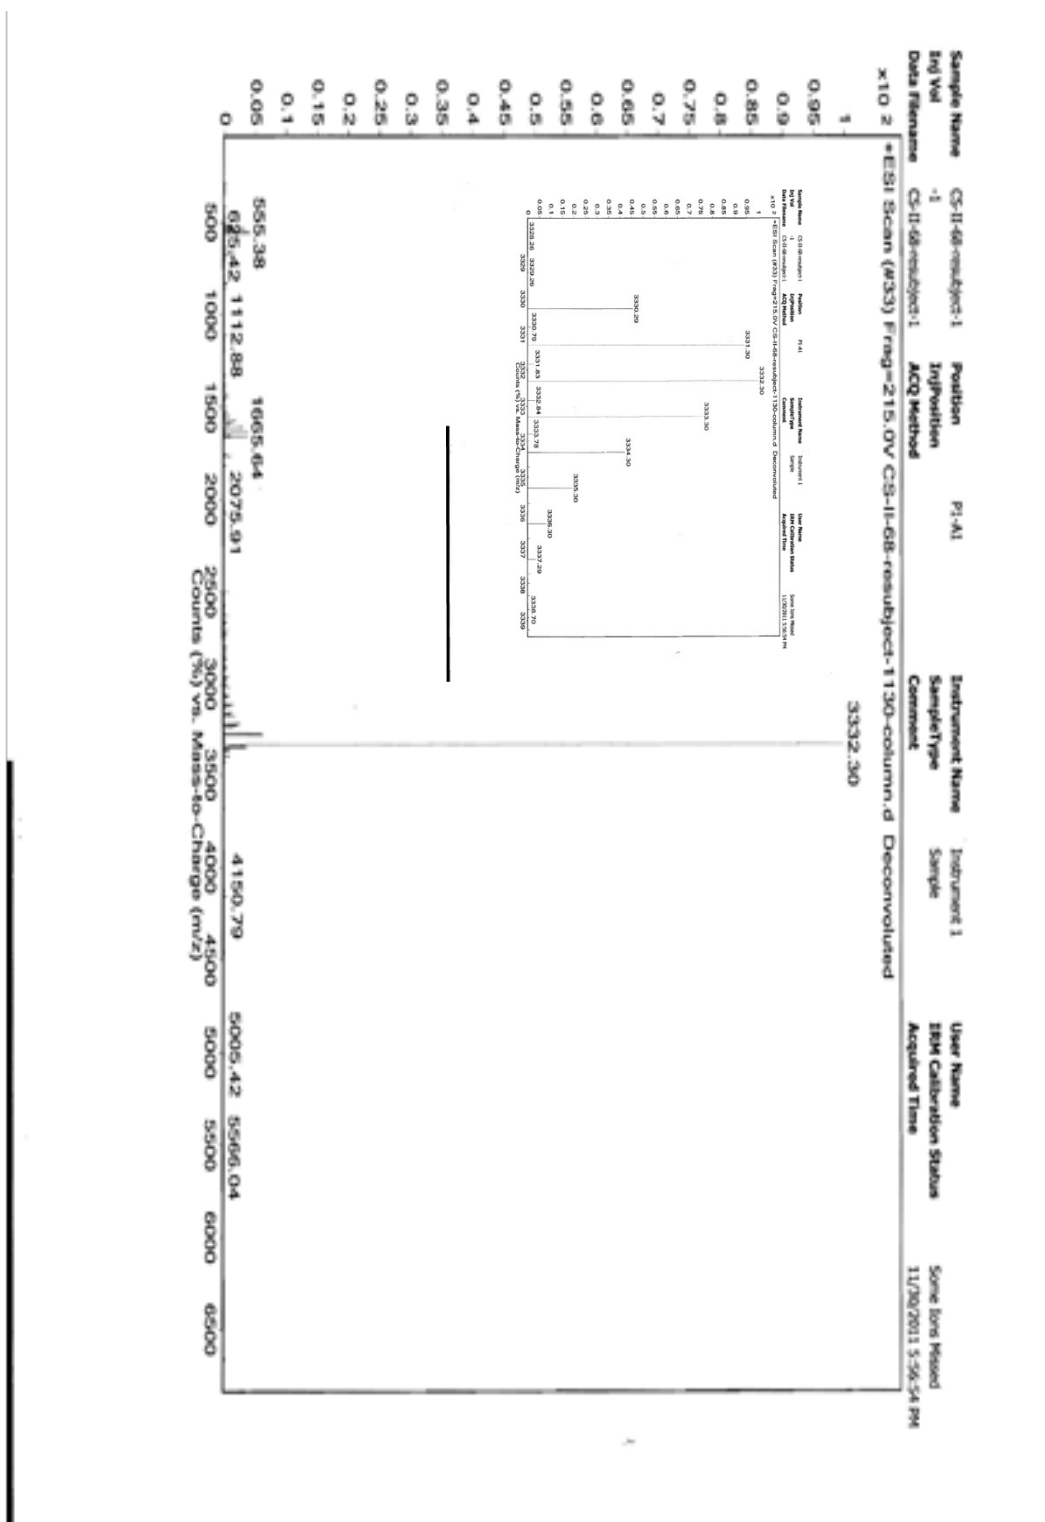

(2) = deuterium

data file: 21000001 / sample 6 / home / fcdirect / vnmr3g / data  
date: 20060307  
time: 100700

Pulse Sequence: zgpg30  
Solvent: CDCl3  
Acquisition Date: 20060307  
Acquisition Time: 100700  
Temperature: 300.2 K  
Sweep Rate: 1000 Hz  
F2: 500.135 MHz  
F1: 125.761 MHz  
Total Time: 6 min, 45 sec

1.472

1.000

0.999

0.998

0.997

0.996

0.995

0.994

0.993

0.992

0.991

0.990

0.989

0.988

0.987

0.986

0.985

0.984

0.983

0.982

0.981

0.980

0.979

0.978

0.977

0.976

0.975

0.974

0.973

0.972

0.971

0.970

0.969

0.968

0.967

0.966

0.965

0.964

0.963

0.962

0.961

0.960

0.959

0.958

0.957

0.956

0.955

0.954

0.953

0.952

0.951

0.950

0.949

0.948

0.947

0.946

0.945

0.944

0.943

0.942

0.941

0.940

0.939

0.938

0.937

0.936

0.935

0.934

0.933

0.932

0.931

0.930

0.929

0.928

0.927

0.926

0.925

0.924

0.923

0.922

0.921

0.920

0.919

0.918

0.917

0.916

0.915

0.914

0.913

0.912

0.911

0.910

0.909

0.908

0.907

0.906

0.905

0.904

0.903

0.902

0.901

0.900

0.899

0.898

0.897

0.896

0.895

0.894

0.893

0.892

0.891

0.890

0.889

0.888

0.887

0.886

0.885

0.884

0.883

0.882

0.881

0.880

0.879

0.878

0.877

0.876

0.875

0.874

0.873

0.872

0.871

0.870

0.869

0.868

0.867

0.866

0.865

0.864

0.863

0.862

0.861

0.860

0.859

0.858

0.857

0.856

0.855

0.854

0.853

0.852

0.851

0.850

0.849

0.848

0.847

0.846

0.845

0.844

0.843

0.842

0.841

0.840

0.839

0.838

0.837

0.836

0.835

0.834

0.833

0.832

0.831

0.830

0.829

0.828

0.827

0.826

0.825

0.824

0.823

0.822

0.821

0.820

0.819

0.818

0.817

0.816

0.815

0.814

0.813

0.812

0.811

0.810

0.809

0.808

0.807

0.806

0.805

0.804

0.803

0.802

0.801

0.800

0.799

0.798

0.797

0.796

0.795

0.794

0.793

0.792

0.791

0.790

0.789

0.788

0.787

0.786

0.785

0.784

0.783

0.782

0.781

0.780

0.779

0.778

0.777

0.776

0.775

0.774

0.773

0.772

0.771

0.770

0.769

0.768

0.767

0.766

0.765

0.764

0.763

0.762

0.761

0.760

0.759

0.758

0.757

0.756

0.755

0.754

0.753

0.752

0.751

0.750

0.749

0.748

0.747

0.746

0.745

0.744

0.743

0.742

0.741

0.740

0.739

0.738

0.737

0.736

0.735

0.734

0.733

0.732

0.731

0.730

0.729

0.728

0.727

0.726

0.725

0.724

0.723

0.722

0.721

0.720

0.719

0.718

0.717

0.716

0.715

0.714

0.713

0.712

0.711

0.710

0.709

0.708

0.707

0.706

0.705

0.704

0.703

0.702

0.701

0.700

0.699

0.698

0.697

0.696

0.695

0.694

0.693

0.692

0.691

0.690

0.689

0.688

0.687

0.686

0.685

0.684

0.683

0.682

0.681

0.680

0.679

0.678

0.677

0.676

0.675

0.674

0.673

0.672

0.671

0.670

0.669

0.668

0.667

0.666

0.665

0.664

0.663

0.662

0.661

0.660

0.659

0.658

0.657

0.656

0.655

0.654

0.653

0.652

0.651

0.650

0.649

0.648

0.647

0.646

0.645

0.644

0.643

0.642

0.641

0.640

0.639

0.638

0.637

0.636

0.635

0.634

0.633

0.632

0.631

0.630

0.629

0.628

0.627

0.626

0.625

0.624

0.623

0.622

0.621

0.620

0.619

0.618

0.617

0.616

0.615

0.614

0.613

0.612

0.611

0.

**Figure S23.  $^{13}\text{C}$  NMR Spectrum of 7.**

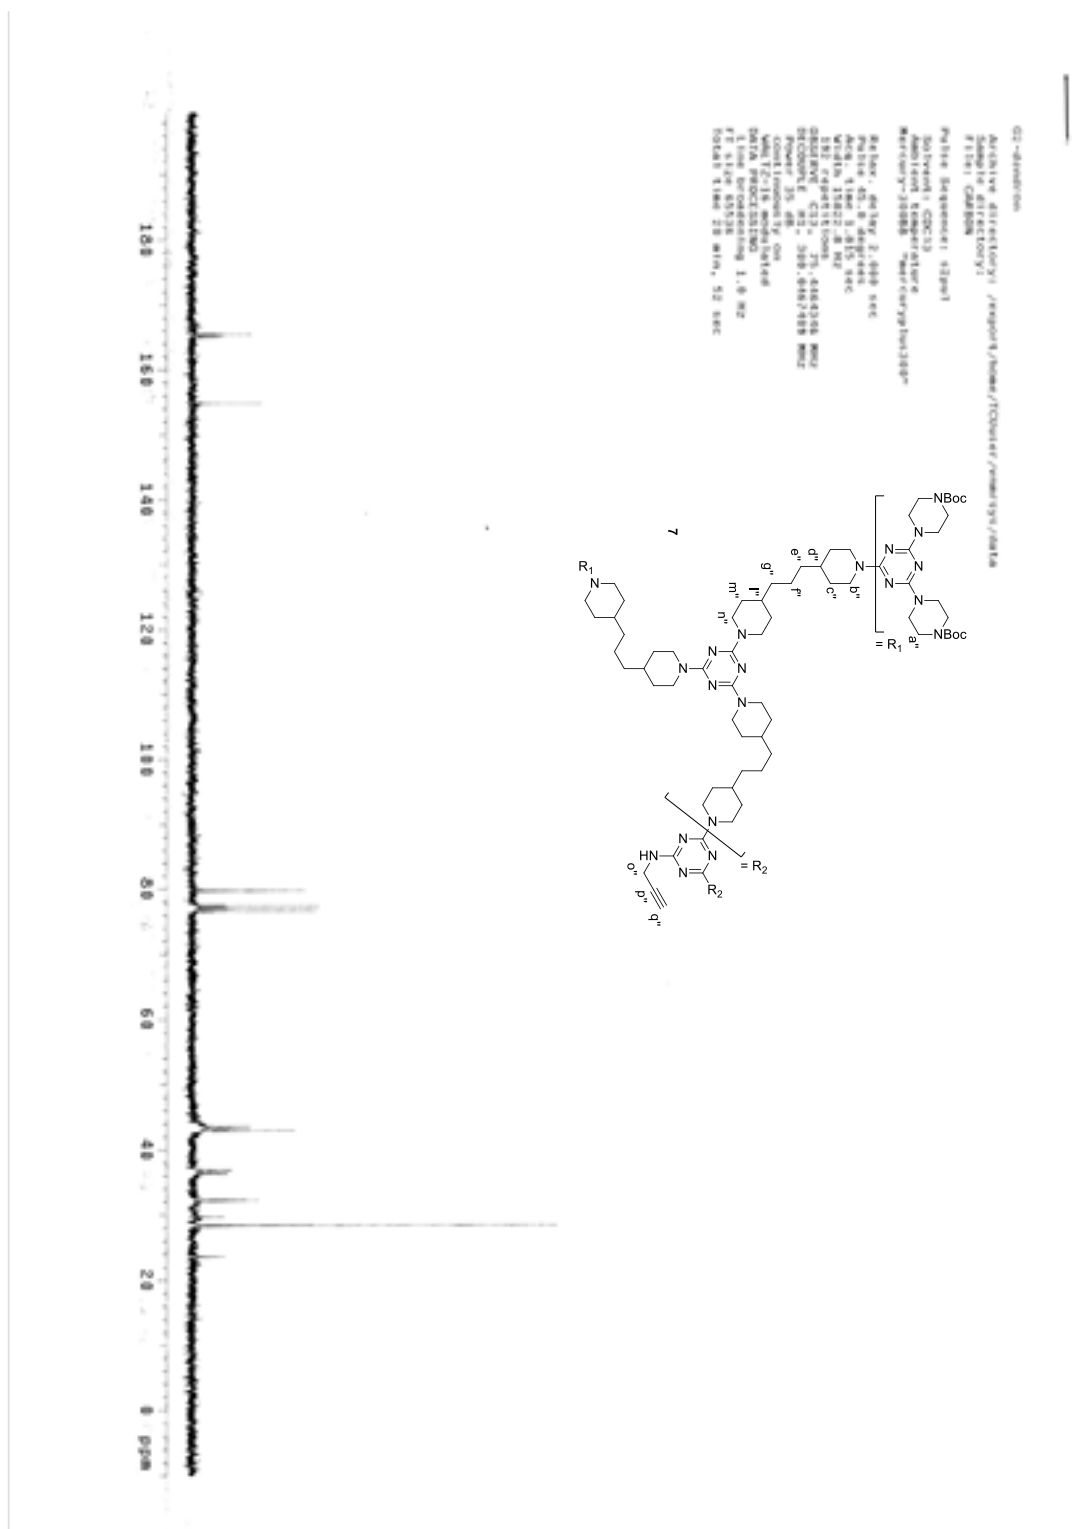



## Synthesis of 8

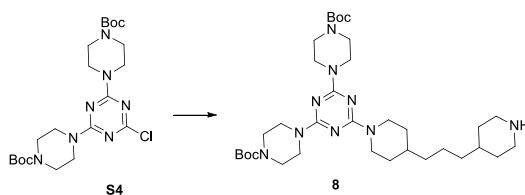

**Compound 8.** To a solution of monochlorotriazine **S4** (4.3g, 8.88 mmol) in dichloromethane (80 mL) and methanol (8 mL), a solution of trimethylene dipiperidine (11.2 g, 53.3 mmol) in dichloromethane (20 mL) and methanol (2 mL) was added at rt then stirred for 16 h. The reaction was washed brine, dried over  $\text{MgSO}_4$ , and then concentrated. The crude product was purified by column chromatography (DCM:MeOH = 97:3  $\rightarrow$  DCM:MeOH = 17:3; TLC  $R_f$  = 0.3 with DCM:MeOH = 17:3) to give **8** as a foam (5.16 g, 88%).  $^1\text{H}$  NMR (300 MHz,  $\text{CDCl}_3$ ):  $\delta$  4.67 (d,  $J$  = 12.9, 2H,  $b_e''$ ), 3.70 (s, 8H,  $a'''$ ), 3.40 (s, 8H,  $a''$ ), 3.06 (d,  $J$  = 12.0, 2H,  $n_e''$ ), 2.91 (br s, 1H, NH), 2.69 (t,  $J$  = 11.4, 2H,  $b_a''$ ), 2.58 (t,  $J$  = 12.0, 2H,  $n_a''$ ), 1.68 (d,  $J$  = 12.3, 4H,  $C_e''$ ,  $m_e''$ ), 1.46 (s, 18H, Boc), 1.39-1.00 (m, 12H,  $C_a''$ ,  $d''$ ,  $e''$ ,  $f''$ ,  $g''$ );  $^{13}\text{C}$  NMR (75 MHz,  $\text{CDCl}_3$ )  $\delta$  = 165.4( $z'$ ), 164.9( $y'$ ), 154.8(Boc), 79.7(Boc), 46.5( $n''$ ), 43.4( $b''$ ), 42.9( $a''$ ), 37.2( $g''$ ), 36.7( $e''$ ), 36.3( $i''$ ), 35.9( $d''$ ), 33.1( $m''$ ), 32.2( $c''$ ), 28.4(Boc), 23.4( $f''$ ); HRMS (ESI) calcd for  $\text{C}_{34}\text{H}_{60}\text{N}_9\text{O}_4$  658.4768, found 658.5027 ( $\text{M}+\text{H}$ ) $^+$ .

**Figure S24. Mass Spectrum of 8.** The trace shows loss of BOC and isobutylene as commonly observed and attributed to ionization-induced fragmentation.

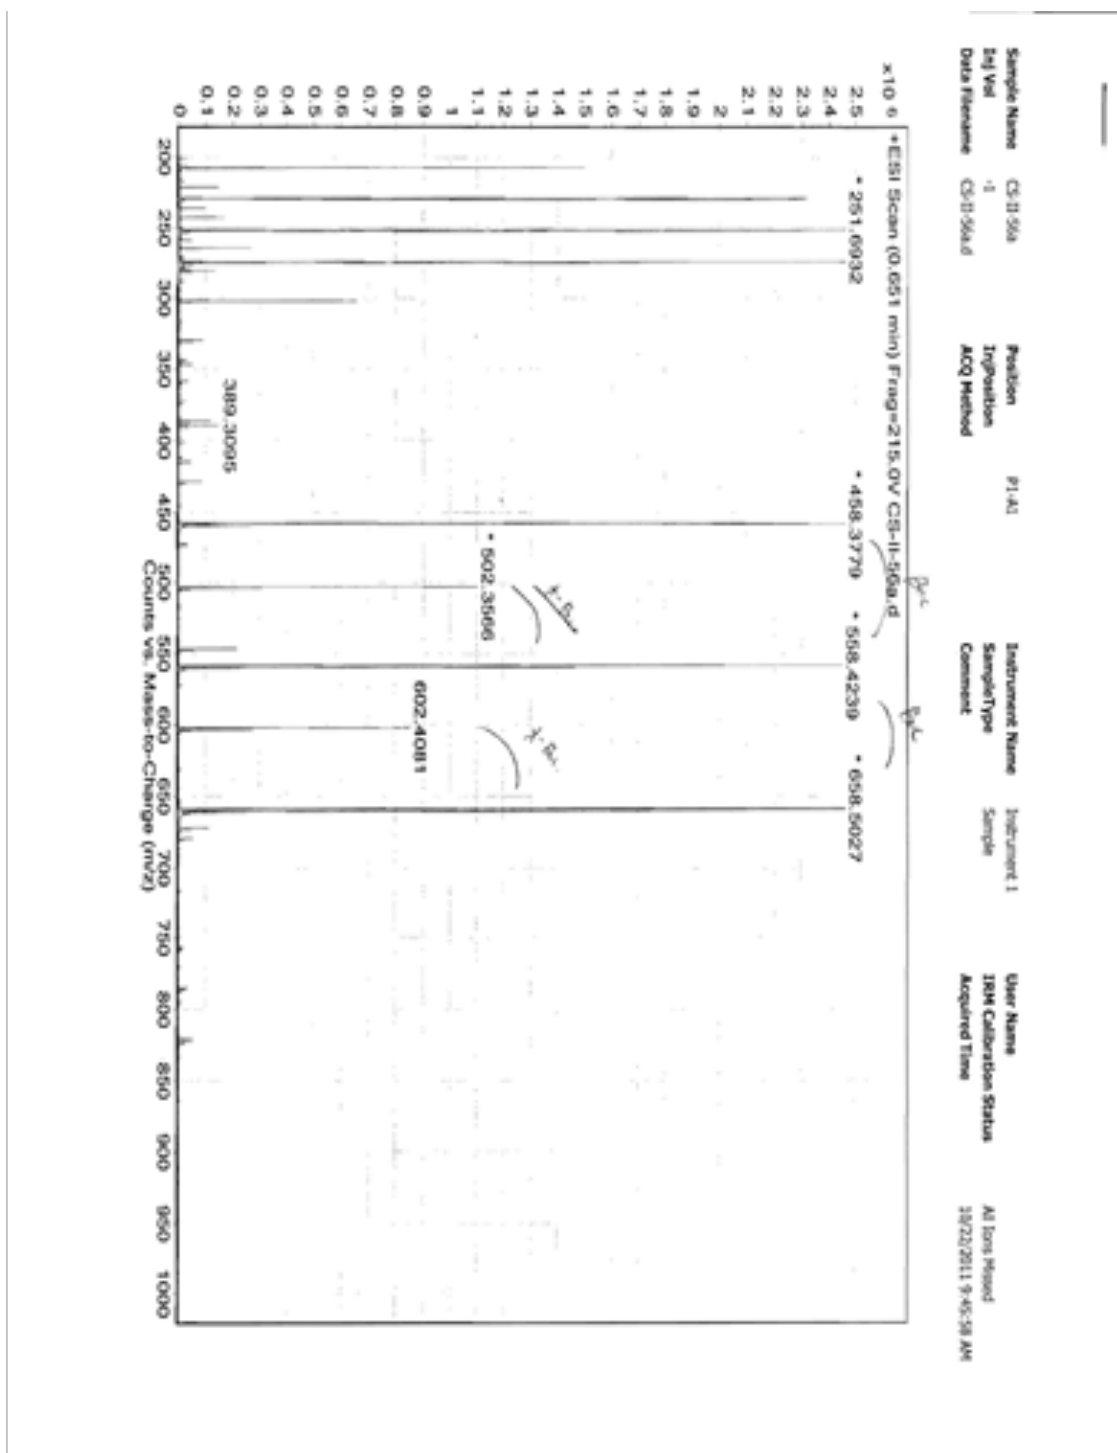



Figure S26.  $^{13}\text{C}$  NMR Spectrum of 8.

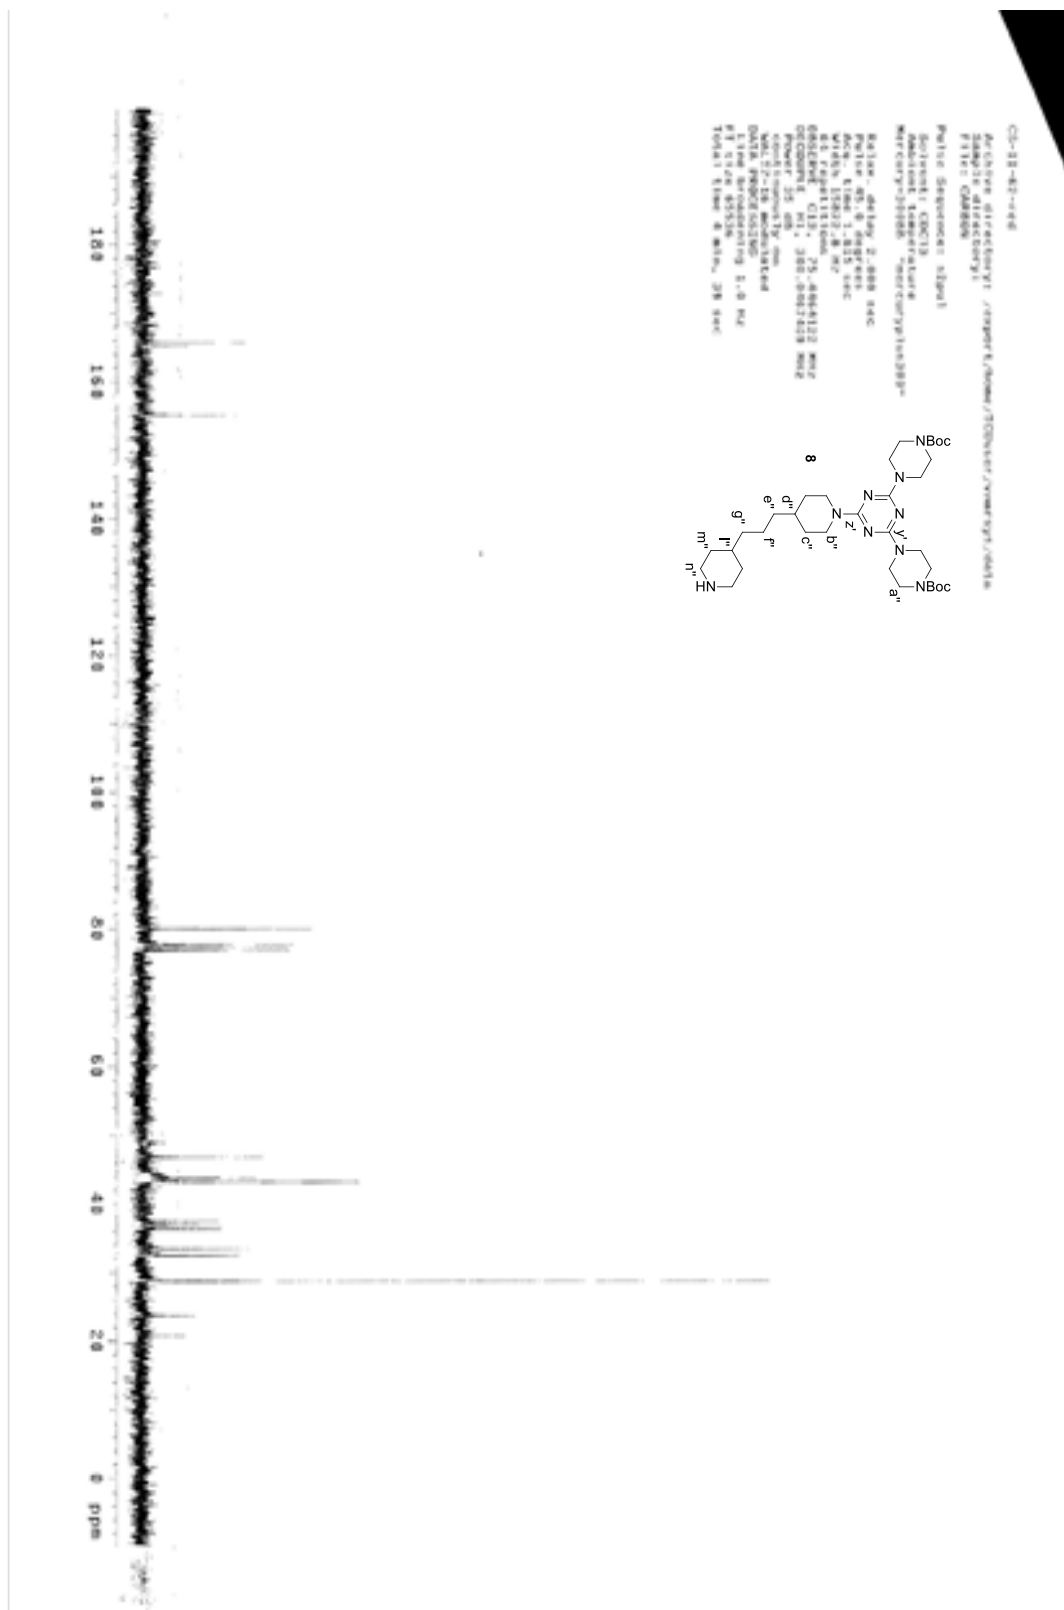

## Synthesis of S5

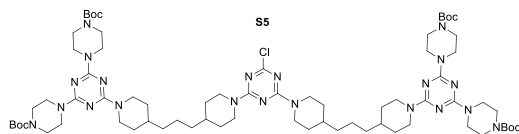

**Monochlorotriazine S5.** To a solution of compound **8** (3.99 g, 6.08 mmol) and DIPEA (1.6 mL, 9.12 mmol) in THF (40 mL) a solution of cyanuric chloride (561 mg, 3.04 mmol) was added at 0°C. After 30 min, the reaction warmed to room temperature then stirred for 22 h. The reaction was quenched with water (20 mL) removed under vacuo and all of volatile solvent was removed under vacuo. The residue was dissolved in dichloromethane and organic layer was washed with brine, dried over MgSO<sub>4</sub>, and then concentrated. The crude product was purified by column chromatography (EtOAc:hexanes = 3:7; TLC R<sub>f</sub> = 0.22 with EtOAc:hexanes = 3:7) to give **S5** as a foam (3.84 g, 88%). <sup>1</sup>H NMR (300 MHz, CDCl<sub>3</sub>): δ 4.69 (d, *J* = 10.8, 8H, b<sub>e</sub>''), 3.73 (s, 16H, a'''), 3.43 (s, 16H, a''), 2.75 (q, *J* = 13.8, 8H, b<sub>a</sub>''), 1.71 (t, *J* = 9.3, 8H, C<sub>e</sub>''), 1.47 (s, 32H, Boc), 1.39-1.00 (m, 24H, C<sub>a</sub>'', d'', e'', f''); <sup>13</sup>C NMR (75 MHz, CDCl<sub>3</sub>) δ 164.0(y'), 154.8(Boc), 79.8(Boc), 43.8(n''), 43.5(b''), 43.0(a''), 36.7(g''), 36.6(e''), 36.2(i''), 36.0(d''), 32.2(m''), 32.2(c''), 28.4(Boc), 23.5(f''); HRMS (ESI) calcd for C<sub>71</sub>H<sub>117</sub>ClN<sub>21</sub>O<sub>8</sub> 1426.90825, found 1426.9116 (M+H).<sup>+</sup>

**Figure S27. Mass Spectrum of S5.** The line at 713 corresponds to doubly-charged S5. The other lines are not assigned.

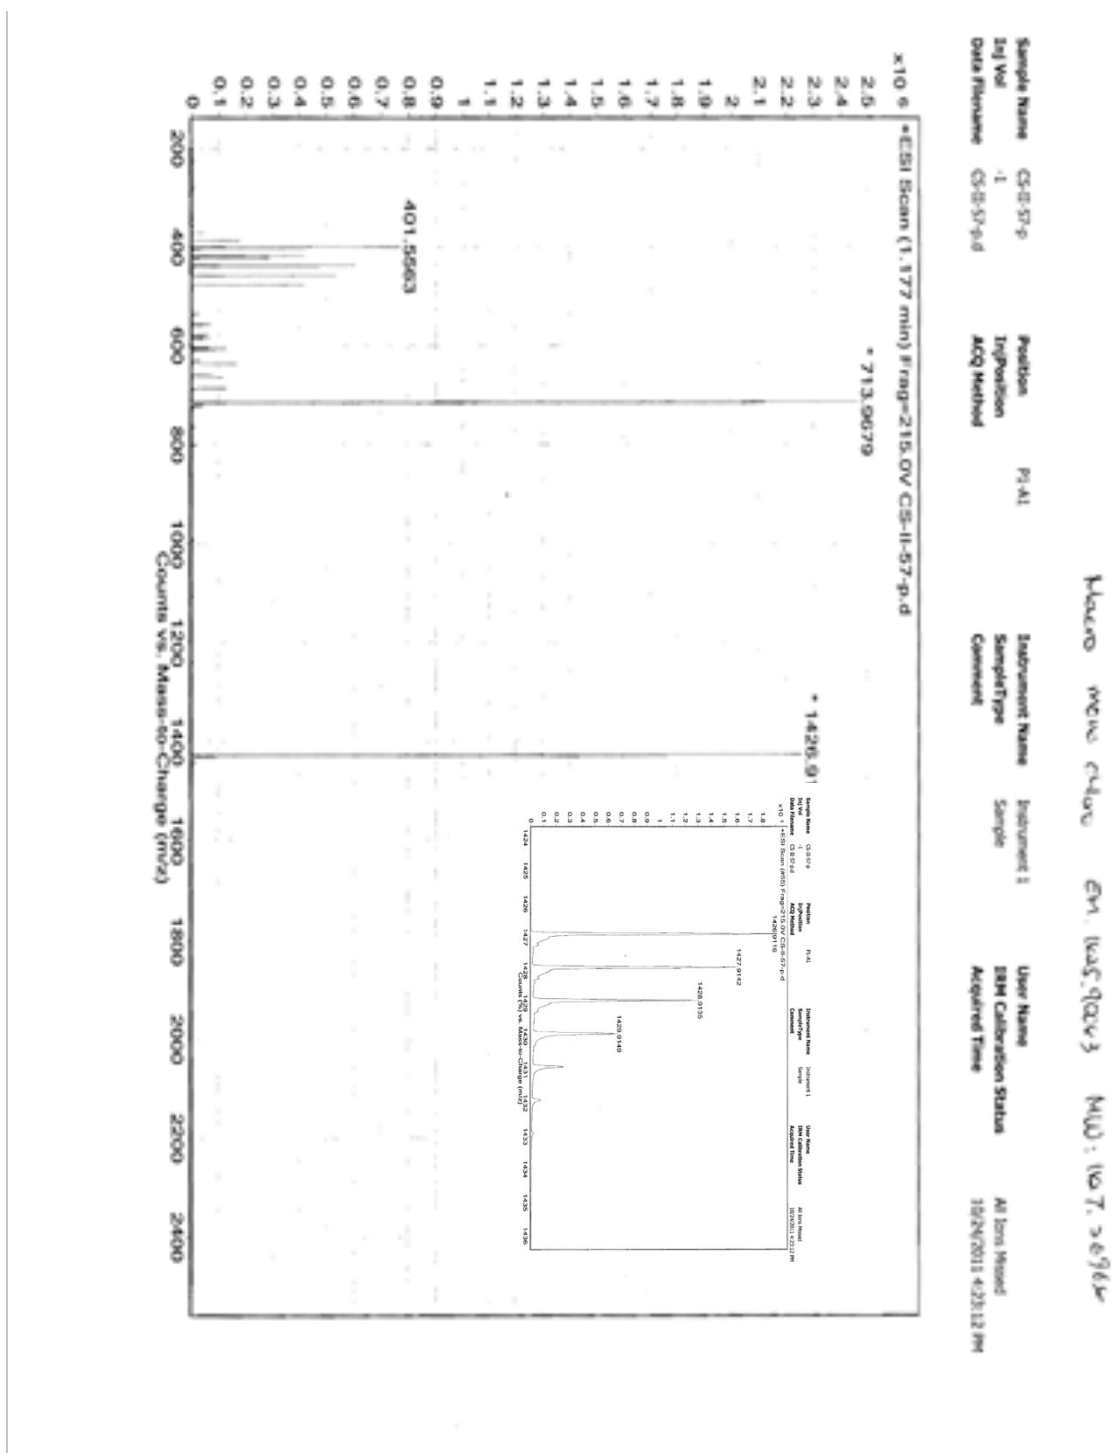

CS-13--83c--piperazine-2-piperidine-mimetic  
Acquire: 01/06/2015 1:00:00 PM  
F1: 101.000000  
F2: 101.000000  
F3: 101.000000  
F4: 101.000000  
F5: 101.000000  
F6: 101.000000  
F7: 101.000000  
F8: 101.000000  
F9: 101.000000  
F10: 101.000000  
F11: 101.000000  
F12: 101.000000  
F13: 101.000000  
F14: 101.000000  
F15: 101.000000  
F16: 101.000000  
F17: 101.000000  
F18: 101.000000  
F19: 101.000000  
F20: 101.000000  
F21: 101.000000  
F22: 101.000000  
F23: 101.000000  
F24: 101.000000  
F25: 101.000000  
F26: 101.000000  
F27: 101.000000  
F28: 101.000000  
F29: 101.000000  
F30: 101.000000  
F31: 101.000000  
F32: 101.000000  
F33: 101.000000  
F34: 101.000000  
F35: 101.000000  
F36: 101.000000  
F37: 101.000000  
F38: 101.000000  
F39: 101.000000  
F40: 101.000000  
F41: 101.000000  
F42: 101.000000  
F43: 101.000000  
F44: 101.000000  
F45: 101.000000  
F46: 101.000000  
F47: 101.000000  
F48: 101.000000  
F49: 101.000000  
F50: 101.000000  
F51: 101.000000  
F52: 101.000000  
F53: 101.000000  
F54: 101.000000  
F55: 101.000000  
F56: 101.000000  
F57: 101.000000  
F58: 101.000000  
F59: 101.000000  
F60: 101.000000  
F61: 101.000000  
F62: 101.000000  
F63: 101.000000  
F64: 101.000000  
F65: 101.000000  
F66: 101.000000  
F67: 101.000000  
F68: 101.000000  
F69: 101.000000  
F70: 101.000000  
F71: 101.000000  
F72: 101.000000  
F73: 101.000000  
F74: 101.000000  
F75: 101.000000  
F76: 101.000000  
F77: 101.000000  
F78: 101.000000  
F79: 101.000000  
F80: 101.000000  
F81: 101.000000  
F82: 101.000000  
F83: 101.000000  
F84: 101.000000  
F85: 101.000000  
F86: 101.000000  
F87: 101.000000  
F88: 101.000000  
F89: 101.000000  
F90: 101.000000  
F91: 101.000000  
F92: 101.000000  
F93: 101.000000  
F94: 101.000000  
F95: 101.000000  
F96: 101.000000  
F97: 101.000000  
F98: 101.000000  
F99: 101.000000  
F100: 101.000000  
F101: 101.000000  
F102: 101.000000  
F103: 101.000000  
F104: 101.000000  
F105: 101.000000  
F106: 101.000000  
F107: 101.000000  
F108: 101.000000  
F109: 101.000000  
F110: 101.000000  
F111: 101.000000  
F112: 101.000000  
F113: 101.000000  
F114: 101.000000  
F115: 101.000000  
F116: 101.000000  
F117: 101.000000  
F118: 101.000000  
F119: 101.000000  
F120: 101.000000  
F121: 101.000000  
F122: 101.000000  
F123: 101.000000  
F124: 101.000000  
F125: 101.000000  
F126: 101.000000  
F127: 101.000000  
F128: 101.000000  
F129: 101.000000  
F130: 101.000000  
F131: 101.000000  
F132: 101.000000  
F133: 101.000000  
F134: 101.000000  
F135: 101.000000  
F136: 101.000000  
F137: 101.000000  
F138: 101.000000  
F139: 101.000000  
F140: 101.000000  
F141: 101.000000  
F142: 101.000000  
F143: 101.000000  
F144: 101.000000  
F145: 101.000000  
F146: 101.000000  
F147: 101.000000  
F148: 101.000000  
F149: 101.000000  
F150: 101.000000  
F151: 101.000000  
F152: 101.000000  
F153: 101.000000  
F154: 101.000000  
F155: 101.000000  
F156: 101.000000  
F157: 101.000000  
F158: 101.000000  
F159: 101.000000  
F160: 101.000000  
F161: 101.000000  
F162: 101.000000  
F163: 101.000000  
F164: 101.000000  
F165: 101.000000  
F166: 101.000000  
F167: 101.000000  
F168: 101.000000  
F169: 101.000000  
F170: 101.000000  
F171: 101.000000  
F172: 101.000000  
F173: 101.000000  
F174: 101.000000  
F175: 101.000000  
F176: 101.000000  
F177: 101.000000  
F178: 101.000000  
F179: 101.000000  
F180: 101.000000  
F181: 101.000000  
F182: 101.000000  
F183: 101.000000  
F184: 101.000000  
F185: 101.000000  
F186: 101.000000  
F187: 101.000000  
F188: 101.000000  
F189: 101.000000  
F190: 101.000000  
F191: 101.000000  
F192: 101.000000  
F193: 101.000000  
F194: 101.000000  
F195: 101.000000  
F196: 101.000000  
F197: 101.000000  
F198: 101.000000  
F199: 101.000000  
F200: 101.000000  
F201: 101.000000  
F202: 101.000000  
F203: 101.000000  
F204: 101.000000  
F205: 101.000000  
F206: 101.000000  
F207: 101.000000  
F208: 101.000000  
F209: 101.000000  
F210: 101.000000  
F211: 101.000000  
F212: 101.000000  
F213: 101.000000  
F214: 101.000000  
F215: 101.000000  
F216: 101.000000  
F217: 101.000000  
F218: 101.000000  
F219: 101.000000  
F220: 101.000000  
F221: 101.000000  
F222: 101.000000  
F223: 101.000000  
F224: 101.000000  
F225: 101.000000  
F226: 101.000000  
F227: 101.000000  
F228: 101.000000  
F229: 101.000000  
F230: 101.000000  
F231: 101.00000

CS-12-57-Boc-6-piperazine-5-piperazine-amine  
 Pulse Sequence: zgpg30  
 Solvent: CDCl<sub>3</sub>  
 Acquisition Temperature: 300.2 K  
 Frequency: 500.13 MHz  
 F2: 500.13 MHz  
 F1: 125.76 MHz  
 Aq: 1.00 sec  
 Wdth: 18.161 Hz  
 SFO: 500.13 MHz  
 SFO2: 125.76 MHz  
 SFO3: 500.13 MHz  
 SFO4: 500.13 MHz  
 SFO5: 500.13 MHz  
 SFO6: 500.13 MHz  
 SFO7: 500.13 MHz  
 SFO8: 500.13 MHz  
 SFO9: 500.13 MHz  
 SFO10: 500.13 MHz  
 SFO11: 500.13 MHz  
 SFO12: 500.13 MHz  
 SFO13: 500.13 MHz  
 SFO14: 500.13 MHz  
 SFO15: 500.13 MHz  
 SFO16: 500.13 MHz  
 SFO17: 500.13 MHz  
 SFO18: 500.13 MHz  
 SFO19: 500.13 MHz  
 SFO20: 500.13 MHz  
 SFO21: 500.13 MHz  
 SFO22: 500.13 MHz  
 SFO23: 500.13 MHz  
 SFO24: 500.13 MHz  
 SFO25: 500.13 MHz  
 SFO26: 500.13 MHz  
 SFO27: 500.13 MHz  
 SFO28: 500.13 MHz  
 SFO29: 500.13 MHz  
 SFO30: 500.13 MHz  
 SFO31: 500.13 MHz  
 SFO32: 500.13 MHz  
 SFO33: 500.13 MHz  
 SFO34: 500.13 MHz  
 SFO35: 500.13 MHz  
 SFO36: 500.13 MHz  
 SFO37: 500.13 MHz  
 SFO38: 500.13 MHz  
 SFO39: 500.13 MHz  
 SFO40: 500.13 MHz  
 SFO41: 500.13 MHz  
 SFO42: 500.13 MHz  
 SFO43: 500.13 MHz  
 SFO44: 500.13 MHz  
 SFO45: 500.13 MHz  
 SFO46: 500.13 MHz  
 SFO47: 500.13 MHz  
 SFO48: 500.13 MHz  
 SFO49: 500.13 MHz  
 SFO50: 500.13 MHz  
 SFO51: 500.13 MHz  
 SFO52: 500.13 MHz  
 SFO53: 500.13 MHz  
 SFO54: 500.13 MHz  
 SFO55: 500.13 MHz  
 SFO56: 500.13 MHz  
 SFO57: 500.13 MHz  
 SFO58: 500.13 MHz  
 SFO59: 500.13 MHz  
 SFO60: 500.13 MHz  
 SFO61: 500.13 MHz  
 SFO62: 500.13 MHz  
 SFO63: 500.13 MHz  
 SFO64: 500.13 MHz  
 SFO65: 500.13 MHz  
 SFO66: 500.13 MHz  
 SFO67: 500.13 MHz  
 SFO68: 500.13 MHz  
 SFO69: 500.13 MHz  
 SFO70: 500.13 MHz  
 SFO71: 500.13 MHz  
 SFO72: 500.13 MHz  
 SFO73: 500.13 MHz  
 SFO74: 500.13 MHz  
 SFO75: 500.13 MHz  
 SFO76: 500.13 MHz  
 SFO77: 500.13 MHz  
 SFO78: 500.13 MHz  
 SFO79: 500.13 MHz  
 SFO80: 500.13 MHz  
 SFO81: 500.13 MHz  
 SFO82: 500.13 MHz  
 SFO83: 500.13 MHz  
 SFO84: 500.13 MHz  
 SFO85: 500.13 MHz  
 SFO86: 500.13 MHz  
 SFO87: 500.13 MHz  
 SFO88: 500.13 MHz  
 SFO89: 500.13 MHz  
 SFO90: 500.13 MHz  
 SFO91: 500.13 MHz  
 SFO92: 500.13 MHz  
 SFO93: 500.13 MHz  
 SFO94: 500.13 MHz  
 SFO95: 500.13 MHz  
 SFO96: 500.13 MHz  
 SFO97: 500.13 MHz  
 SFO98: 500.13 MHz  
 SFO99: 500.13 MHz  
 SFO100: 500.13 MHz  
 SFO101: 500.13 MHz  
 SFO102: 500.13 MHz  
 SFO103: 500.13 MHz  
 SFO104: 500.13 MHz  
 SFO105: 500.13 MHz  
 SFO106: 500.13 MHz  
 SFO107: 500.13 MHz  
 SFO108: 500.13 MHz  
 SFO109: 500.13 MHz  
 SFO110: 500.13 MHz  
 SFO111: 500.13 MHz  
 SFO112: 500.13 MHz  
 SFO113: 500.13 MHz  
 SFO114: 500.13 MHz  
 SFO115: 500.13 MHz  
 SFO116: 500.13 MHz  
 SFO117: 500.13 MHz  
 SFO118: 500.13 MHz  
 SFO119: 500.13 MHz  
 SFO120: 500.13 MHz  
 SFO121: 500.13 MHz  
 SFO122: 500.13 MHz  
 SFO123: 500.13 MHz  
 SFO124: 500.13 MHz  
 SFO125: 500.13 MHz  
 SFO126: 500.13 MHz  
 SFO127: 500.13 MHz  
 SFO128: 500.13 MHz  
 SFO129: 500.13 MHz  
 SFO130: 500.13 MHz  
 SFO131: 500.13 MHz  
 SFO132: 500.13 MHz  
 SFO133: 500.13 MHz  
 SFO134: 500.13 MHz  
 SFO135: 500.13 MHz  
 SFO136: 500.13 MHz  
 SFO137: 500.13 MHz  
 SFO138: 500.13 MHz  
 SFO139: 500.13 MHz  
 SFO140: 500.13 MHz  
 SFO141: 500.13 MHz  
 SFO142: 500.13 MHz  
 SFO143: 500.13 MHz  
 SFO144: 500.13 MHz  
 SFO145: 500.13 MHz  
 SFO146: 500.13 MHz  
 SFO147: 500.13 MHz  
 SFO148: 500.13 MHz  
 SFO149: 500.13 MHz  
 SFO150: 500.13 MHz  
 SFO151: 500.13 MHz  
 SFO152: 500.13 MHz  
 SFO153: 500.13 MHz  
 SFO154: 500.13 MHz  
 SFO155: 500.13 MHz  
 SFO156: 500.13 MHz  
 SFO157: 500.13 MHz  
 SFO158: 500.13 MHz  
 SFO159: 500.13 MHz  
 SFO160: 500.13 MHz  
 SFO161: 500.13 MHz  
 SFO162: 500.13 MHz  
 SFO163: 500.13 MHz  
 SFO164: 500.13 MHz  
 SFO165: 500.13 MHz  
 SFO166: 500.13 MHz  
 SFO167: 500.13 MHz  
 SFO168: 500.13 MHz  
 SFO169: 500.13 MHz  
 SFO170: 500.13 MHz  
 SFO171: 500.13 MHz  
 SFO172: 500.13 MHz  
 SFO173: 500.13 MHz  
 SFO174: 500.13 MHz  
 SFO175: 500.13 MHz  
 SFO176: 500.13 MHz  
 SFO177: 500.13 MHz  
 SFO178: 500.13 MHz  
 SFO179: 500.13 MHz  
 SFO180: 500.13 MHz  
 SFO181: 500.13 MHz  
 SFO182: 500.13 MHz  
 SFO183: 500.13 MHz  
 SFO184: 500.13 MHz  
 SFO185: 500.13 MHz  
 SFO186: 500.13 MHz  
 SFO187: 500.13 MHz  
 SFO188: 500.13 MHz  
 SFO189: 500.13 MHz  
 SFO190: 500.13 MHz  
 SFO191: 500.13 MHz  
 SFO192: 500.13 MHz  
 SFO193: 500.13 MHz  
 SFO194: 500.13 MHz  
 SFO195: 500.13 MHz  
 SFO196: 500.13 MHz  
 SFO197: 500.13 MHz  
 SFO198: 500.13 MHz  
 SFO199: 500.13 MHz  
 SFO200: 500.13 MHz  
 SFO201: 500.13 MHz  
 SFO202: 500.13 MHz  
 SFO203: 500.13 MHz  
 SFO204: 500.13 MHz  
 SFO205: 500.13 MHz  
 SFO206: 500.13 MHz  
 SFO207: 500.13 MHz  
 SFO208: 500.13 MHz  
 SFO209: 500.13 MHz  
 SFO210: 500.13 MHz  
 SFO211: 500.13 MHz  
 SFO212: 500.13 MHz  
 SFO213: 500.13 MHz  
 SFO214: 500.13 MHz  
 SFO215: 500.13 MHz  
 SFO216: 500.13 MHz  
 SFO217: 500.13 MHz  
 SFO218: 500.13 MHz  
 SFO219: 500.13 MHz  
 SFO220: 500.13 MHz  
 SFO221: 500.13 MHz  
 SFO222: 500.13 MHz  
 SFO223: 500.13 MHz  
 SFO224: 500.13 MHz  
 SFO225: 500.13 MHz  
 SFO226: 500.13 MHz



## Synthesis of 9

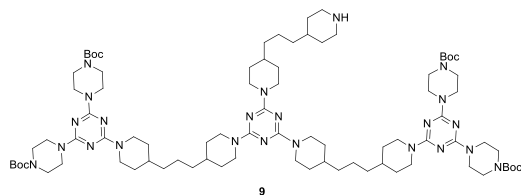

**Compound 9.** To a solution of monochlorotriazine **S5** (3 g, 2.1 mmol) in dichloromethane (20 mL) and THF (20 mL), trimethylene dipiperidine (2.2 g, 10.5 mmol) was added at rt then stirred for 24 h. The reaction was washed brine, dried over  $\text{MgSO}_4$ , and then concentrated. The crude product was purified by column chromatography (DCM:MeOH = 19:1→DCM:MeOH = 22:3; TLC  $R_f$  = 0.28 with DCM:MeOH = 22:3) to give **9** as a solid (2.39 g, 71%).  $^1\text{H}$  NMR (300 MHz,  $\text{CDCl}_3$ ):  $\delta$  4.72 (d,  $J$  = 11.4, 12H,  $b_e''$ ), 3.73 (s, 16H,  $a'''$ ), 3.43 (s, 16H,  $a''$ ), 2.71 (q,  $J$  = 11.1, 12H,  $b_a''$ ), 1.68 (br s, 12H,  $C_e''$ ), 1.48 (s, 32H, Boc), 1.39-1.00 (m, 36H,  $C_a'', d'', e'', f''$ );  $^{13}\text{C}$  NMR (75 MHz,  $\text{CDCl}_3$ )  $\delta$  165.3( $z''$ ), 165.3( $z'$ ), 164.9( $y'$ ), 154.8(Boc), 79.8(Boc), 43.5( $b''$ ), 42.9( $a''$ ), 36.9( $e''$ ), 36.3( $d''$ ), 32.2( $c''$ ), 28.4(Boc), 23.6( $f''$ ); HRMS (ESI) calcd for  $\text{C}_{84}\text{H}_{142}\text{N}_{23}\text{O}_8$  1601.1412, found 1601.1502 ( $\text{M}+\text{H}$ ) $^+$ .

**Figure S30. Mass Spectrum of 9.** The line at 801 corresponds to doubly-charged 9. The lines at lower m/z are not assigned.

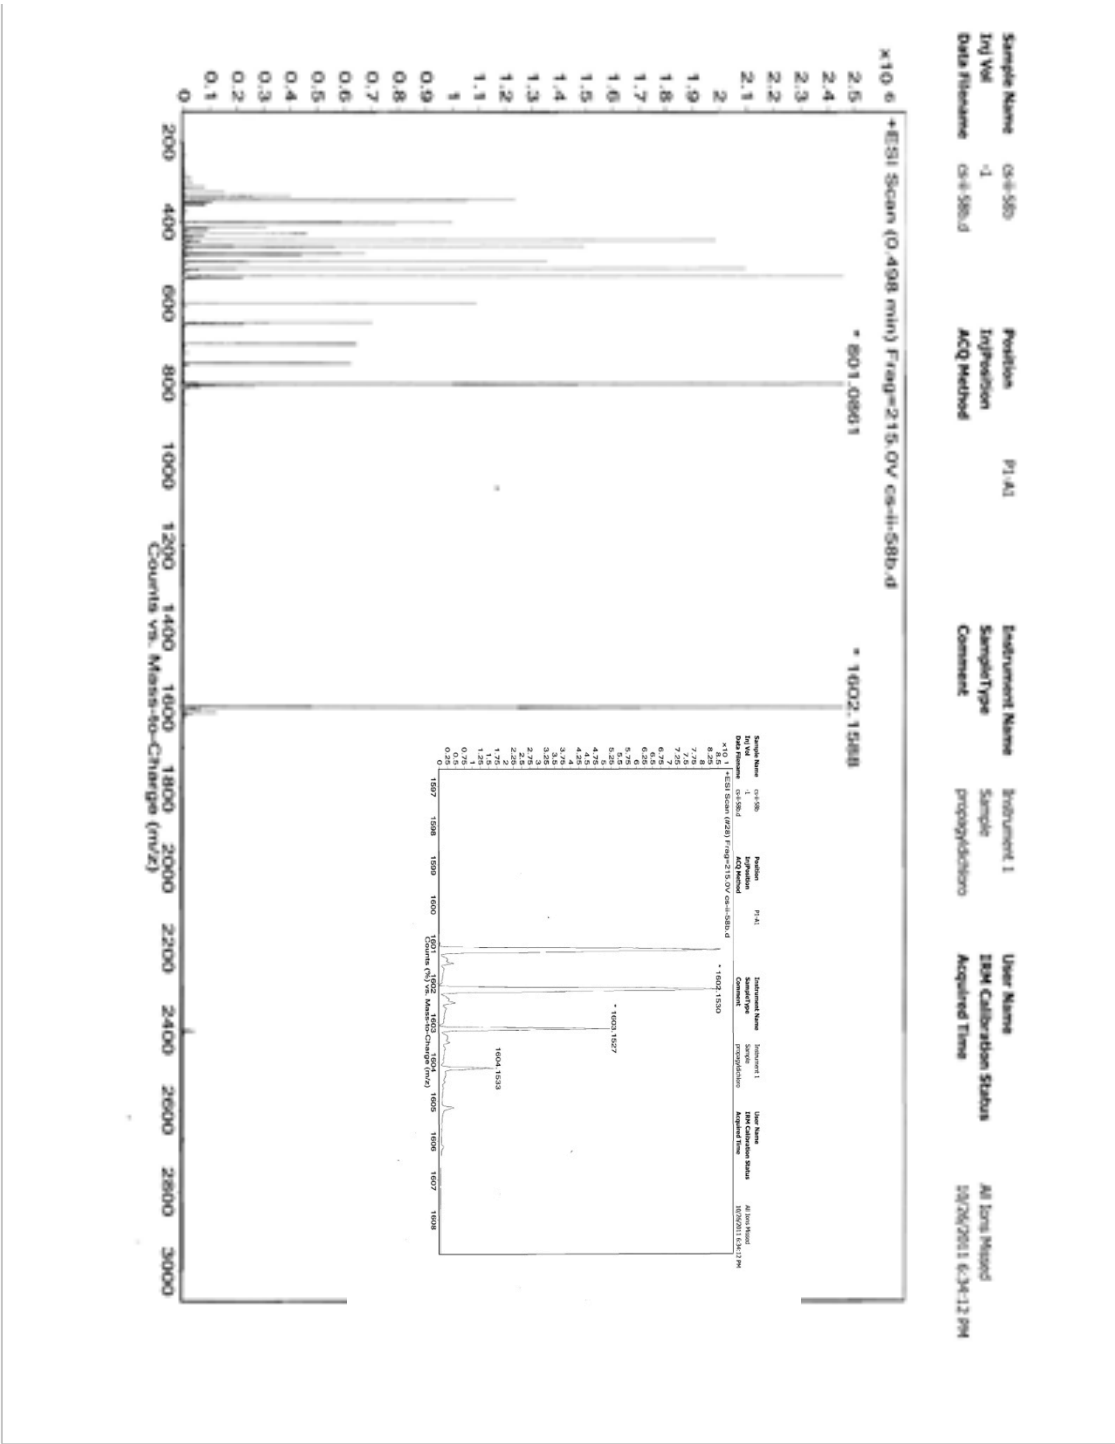

[illegible]

**Figure S32.  $^{13}\text{C}$  NMR of 9.**

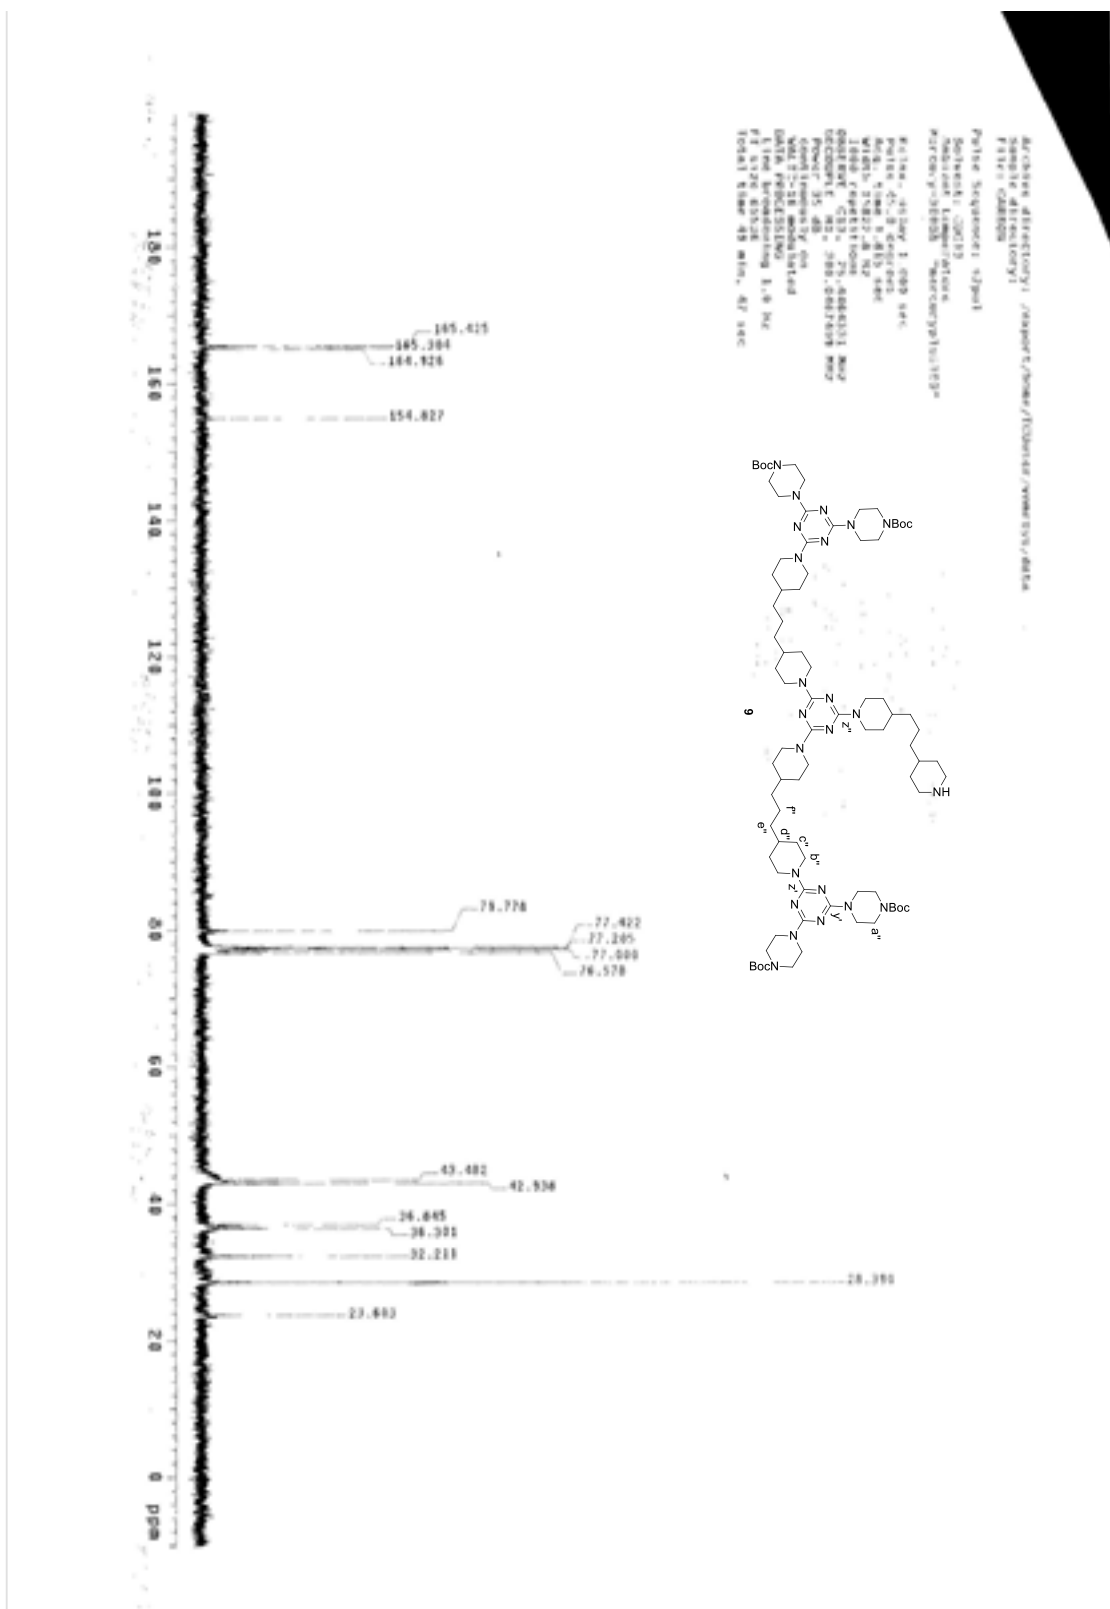

## Preparation of 13

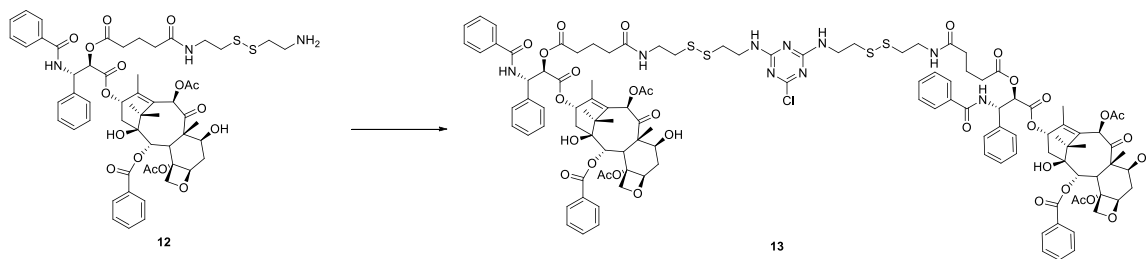

**Compound 13.** To a solution of compound **12** (399 mg, 0.36 mmol) and DIPEA (64 mg, 0.49 mmol) in THF (20 mL) a solution of cyanuric chloride (30 mg, 0.16 mmol) was added at 0°C. After 30 min, the reaction warmed to room temperature then stirred for 24 h. The reaction was quenched with water (20 mL) and diluted with dichloromethane (30 mL). Organic layer was washed brine, dried over MgSO<sub>4</sub>, and then concentrated. The crude product was purified by column chromatography (DCM:MeOH = 19:1; TLC R<sub>f</sub> = 0.3 with DCM:MeOH = 19:1) to give **13** as a foam (338 mg, 89 %). The excess of paclitaxel-cystamine **12** was recovered from the purification. <sup>1</sup>H NMR (300 MHz, CDCl<sub>3</sub>+MeOH-d<sub>4</sub>): δ 8.14 (d, *J* = 6.9, 4H, i), 7.78 (d, *J* = 8.7, 4H, c), 7.62 (t, *J* = 7.5 Hz, 2H, g), 7.54-7.23 (m, 20H, a, b, d, e, f, h), 6.37 (s, 2H, y), 6.17 (t, *J* = 8.4, 2H, n), 5.95 (d, *J* = 3.9, 2H, l), 5.71 (q, *J* = 8.4, 2H, l), 5.45 (d, *J* = 3.9, 2H, m), 5.00 (d, *J* = 8.4, 2H, u), 4.40 (dd, *J* = 11.1, 6.9, 2H, w), 4.32 (d, *J* = 8.4, 2H, t), 4.23 (d, *J* = 8.4, 2H, t), 3.82 (d, *J* = 6.9, 2H, r), 3.69-3.66 (m, 4H, g'), 3.48 (t, *J* = 6.0 Hz, 4H, j'), 2.89-2.74 (m, 8H, h', i'), 2.56-2.43 (m, 6H, d', f', v), 2.43 (s, 6H, j), 2.31-2.11 (m, 14H, d', f', o), 2.22 (s, 6H, k), 1.98-1.86 (m, 6H, e' v), 1.96 (s, 6H, z), 1.69 (s, 6H, c'), 1.21 (s, 6H, b'), 1.17 (s, 6H, a'); <sup>13</sup>C NMR (75 MHz, CDCl<sub>3</sub>) δ = 204.2 (q'), 173.7(p'), 172.7(o'), 171.2(n'), 170.2(z'), 169.3(m'), 169.1(j'), 169.1(k'), 166.8(l'), 165.5(y'), 141.9(r'), 136.9(g'), 134.0(g), 133.7(h'), 133.4(s'), 132.1(d), 130.3(i), 129.8(i'), 129.4(b), 129.2(a), 128.8(e), 128.7(h), 127.5(c), 127.1(f), 84.8(u), 81.3(s), 78.1(p), 76.7(t), 75.9(y), 75.2(q), 74.4(m), 72.2(n), 71.6(w), 58.4(x), 53.4(l), 46.1(r), 43.5(t'), 40.1(x'), 38.4(u'), 37.5(v'), 37.5(w'), 36.1(o), 35.5(v), 34.9(f'), 33.0(d'), 26.6(b'), 22.7(j), 22.1(a'), 21.0(e'), 20.9(k), 14.6(z), 9.9(c'); HRMS (ESI) calcd for C<sub>115</sub>H<sub>133</sub>ClN<sub>9</sub>O<sub>32</sub> S<sub>4</sub> 2314.7628, found 2314.7006 (M+H)<sup>+</sup>.

**Figure S33. Mass Spectrum of 13.** The line at 1158 corresponds to doubly-charged 13. The line at 1493 is not assigned. It corresponds to loss of 823 (not paclitaxel at 853). This mass defect consistently appears in reactions that utilize trichlorotriazine.

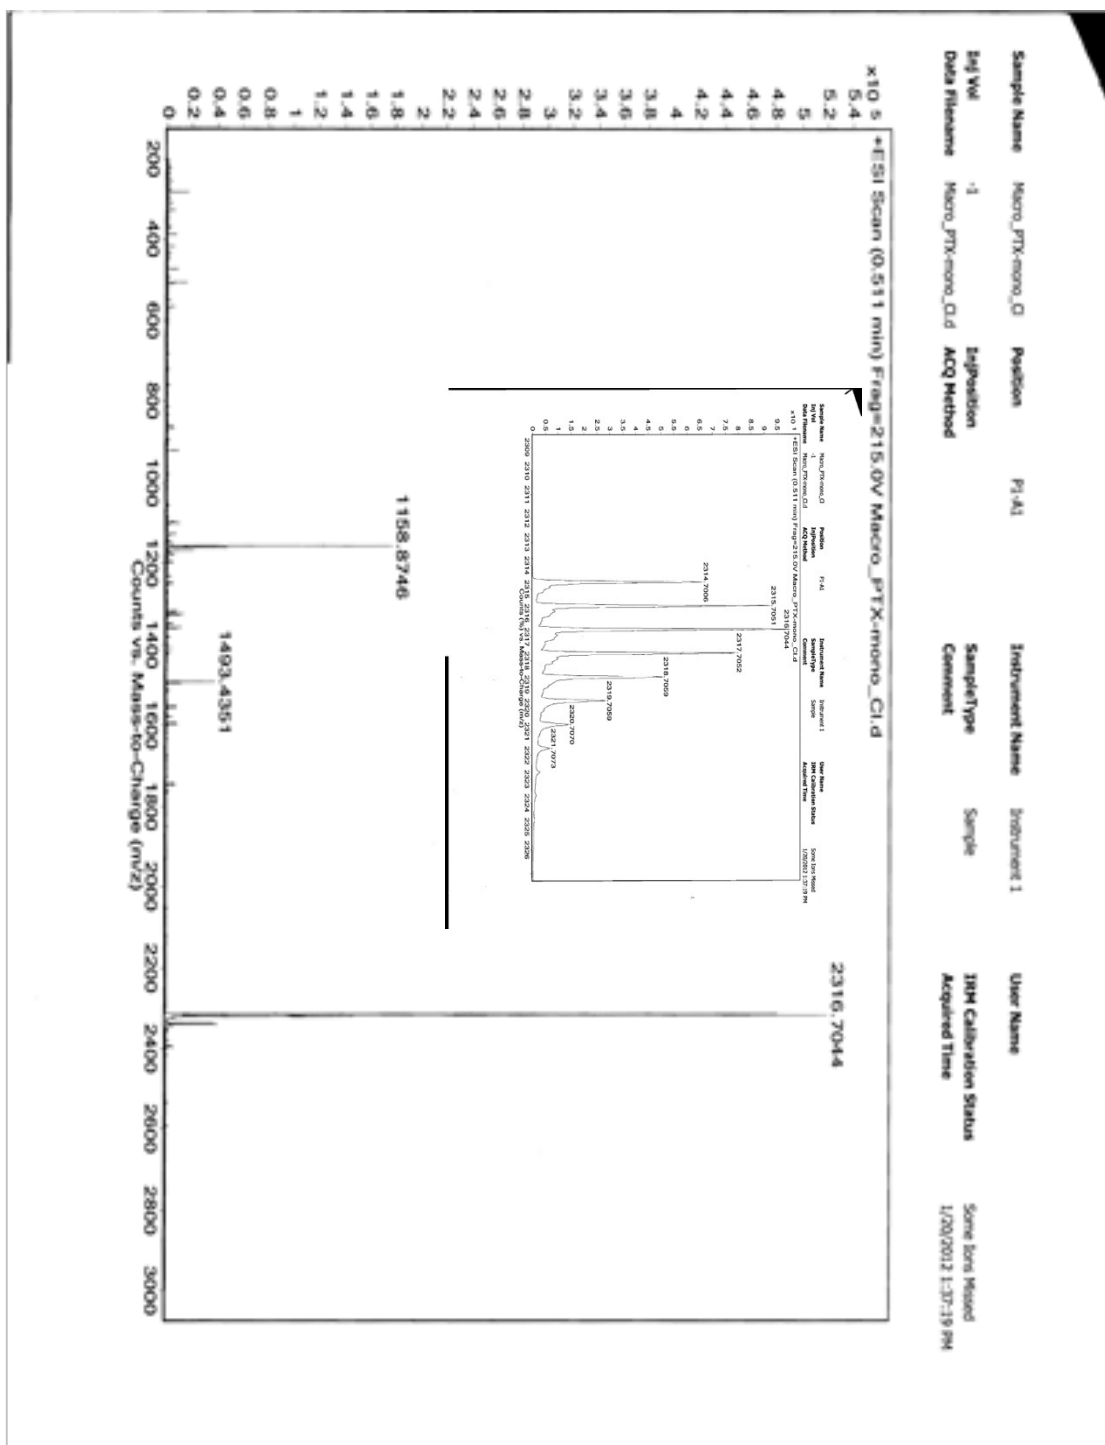

**Figure S34.  $^1\text{H}$  NMR Spectrum of 13.**

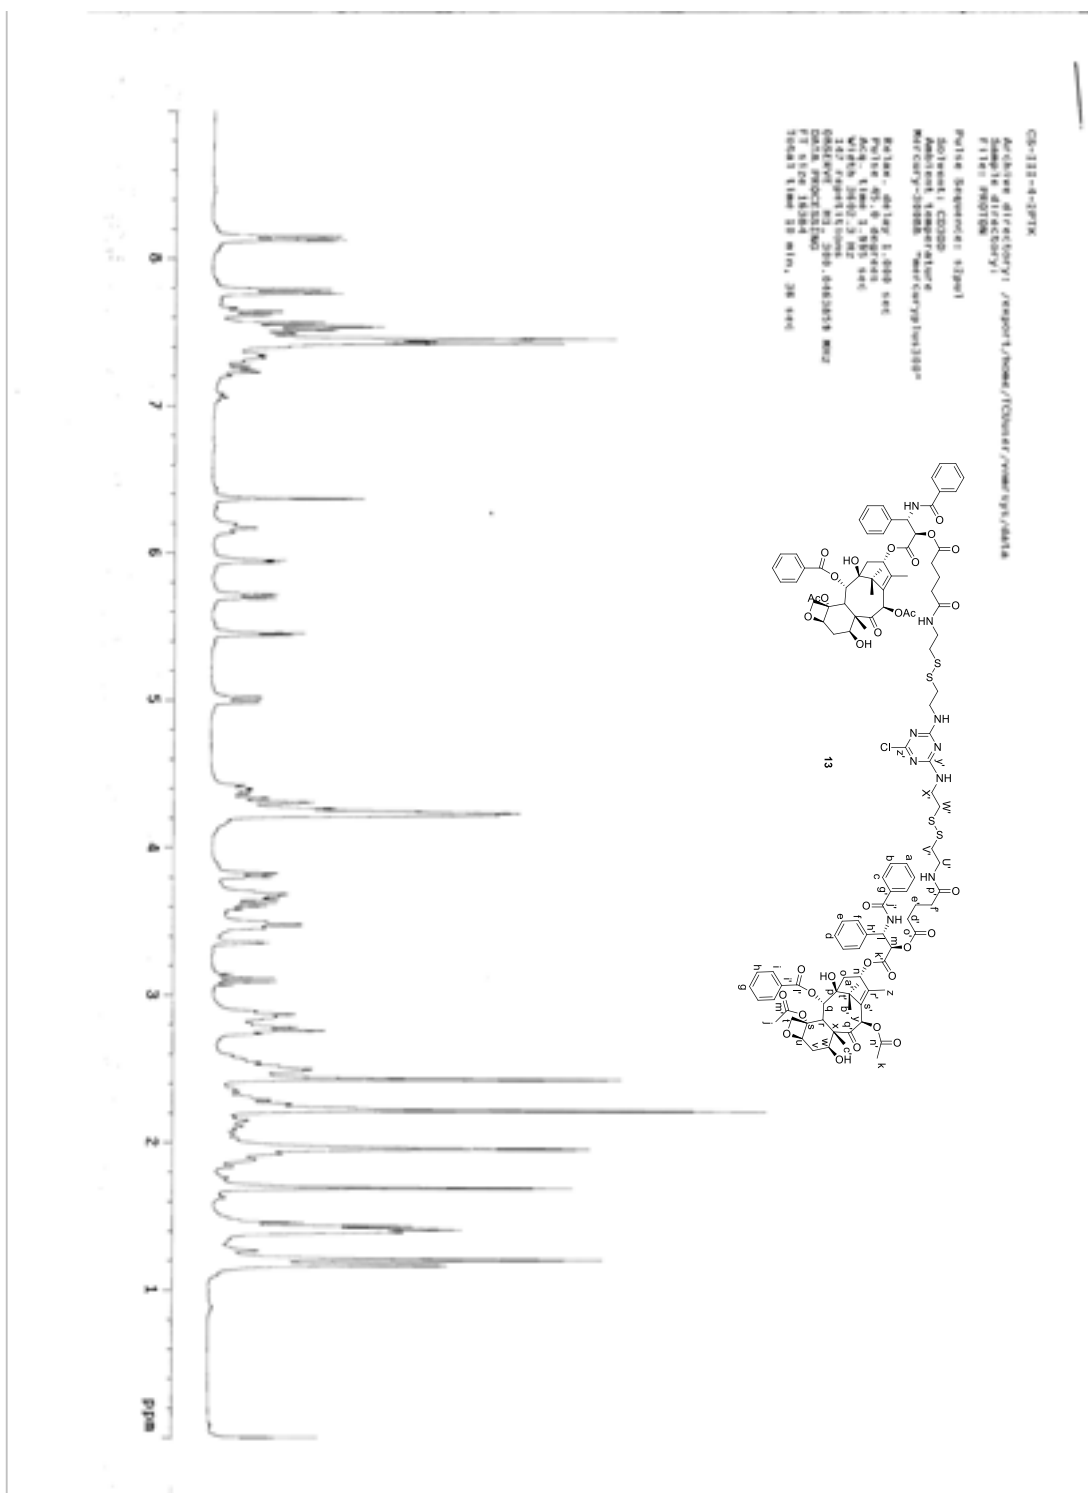

05-113-4-287K  
Acquiring data for 1D 1H NMR (400 MHz, DMSO-d6) of 13  
Sample: 13  
P1: 0.000000  
Pulse Sequence: zgpg30  
Date\_Time: 05/11/2016 10:00:00  
Solvent: DMSO-d6  
Acq: 400.136 MHz  
P1: 0.000000  
P2: 0.000000  
P3: 0.000000  
P4: 0.000000  
P5: 0.000000  
P6: 0.000000  
P7: 0.000000  
P8: 0.000000  
P9: 0.000000  
P10: 0.000000  
P11: 0.000000  
P12: 0.000000  
P13: 0.000000  
P14: 0.000000  
P15: 0.000000  
P16: 0.000000  
P17: 0.000000  
P18: 0.000000  
P19: 0.000000  
P20: 0.000000  
P21: 0.000000  
P22: 0.000000  
P23: 0.000000  
P24: 0.000000  
P25: 0.000000  
P26: 0.000000  
P27: 0.000000  
P28: 0.000000  
P29: 0.000000  
P30: 0.000000  
P31: 0.000000  
P32: 0.000000  
P33: 0.000000  
P34: 0.000000  
P35: 0.000000  
P36: 0.000000  
P37: 0.000000  
P38: 0.000000  
P39: 0.000000  
P40: 0.000000  
P41: 0.000000  
P42: 0.000000  
P43: 0.000000  
P44: 0.000000  
P45: 0.000000  
P46: 0.000000  
P47: 0.000000  
P48: 0.000000  
P49: 0.000000  
P50: 0.000000  
P51: 0.000000  
P52: 0.000000  
P53: 0.000000  
P54: 0.000000  
P55: 0.000000  
P56: 0.000000  
P57: 0.000000  
P58: 0.000000  
P59: 0.000000  
P60: 0.000000  
P61: 0.000000  
P62: 0.000000  
P63: 0.000000  
P64: 0.000000  
P65: 0.000000  
P66: 0.000000  
P67: 0.000000  
P68: 0.000000  
P69: 0.000000  
P70: 0.000000  
P71: 0.000000  
P72: 0.000000  
P73: 0.000000  
P74: 0.000000  
P75: 0.000000  
P76: 0.000000  
P77: 0.000000  
P78: 0.000000  
P79: 0.000000  
P80: 0.000000  
P81: 0.000000  
P82: 0.000000  
P83: 0.000000  
P84: 0.000000  
P85: 0.000000  
P86: 0.000000  
P87: 0.000000  
P88: 0.000000  
P89: 0.000000  
P90: 0.000000  
P91: 0.000000  
P92: 0.000000  
P93: 0.000000  
P94: 0.000000  
P95: 0.000000  
P96: 0.000000  
P97: 0.000000  
P98: 0.000000  
P99: 0.000000  
P100: 0.000000  
P101: 0.000000  
P102: 0.000000  
P103: 0.000000  
P104: 0.000000  
P105: 0.000000  
P106: 0.000000  
P107: 0.000000  
P108: 0.000000  
P109: 0.000000  
P110: 0.000000  
P111: 0.000000  
P112: 0.000000  
P113: 0.000000  
P114: 0.000000  
P115: 0.000000  
P116: 0.000000  
P117: 0.000000  
P118: 0.000000  
P119: 0.000000  
P120: 0.000000  
P121: 0.000000  
P122: 0.000000  
P123: 0.000000  
P124: 0.000000  
P125: 0.000000  
P126: 0.000000  
P127: 0.000000  
P128: 0.000000  
P129: 0.000000  
P130: 0.000000  
P131: 0.000000  
P132: 0.000000  
P133: 0.000000  
P134: 0.000000  
P135: 0.000000  
P136: 0.000000  
P137: 0.000000  
P138: 0.000000  
P139: 0.000000  
P140: 0.000000  
P141: 0.000000  
P142: 0.000000  
P143: 0.000000  
P144: 0.000000  
P145: 0.000000  
P146: 0.000000  
P147: 0.000000  
P148: 0.000000  
P149: 0.000000  
P150: 0.000000  
P151: 0.000000  
P152: 0.000000  
P153: 0.000000  
P154: 0.000000  
P155: 0.000000  
P156: 0.000000  
P157: 0.000000  
P158: 0.000000  
P159: 0.000000  
P160: 0.000000  
P161: 0.000000  
P162: 0.000000  
P163: 0.000000  
P164: 0.000000  
P165: 0.000000  
P166: 0.000000  
P167: 0.000000  
P168: 0.000000  
P169: 0.000000  
P170: 0.000000  
P171: 0.000000  
P172: 0.000000  
P173: 0.000000  
P174: 0.000000  
P175: 0.000000  
P176: 0.000000  
P177: 0.000000  
P178: 0.000000  
P179: 0.000000  
P180: 0.000000  
P181: 0.000000  
P182: 0.000000  
P183: 0.000000  
P184: 0.000000  
P185: 0.000000  
P186: 0.000000  
P187: 0.000000  
P188: 0.000000  
P189: 0.000000  
P190: 0.000000  
P191: 0.000000  
P192: 0.000000  
P193: 0.000000  
P194: 0.000000  
P195: 0.000000  
P196: 0.000000  
P197: 0.000000  
P198: 0.000000  
P199: 0.000000  
P200: 0.000000  
P201: 0.000000  
P202: 0.000000  
P203: 0.000000  
P204: 0.000000  
P205: 0.000000  
P206: 0.000000  
P207: 0.000000  
P208: 0.000000  
P209: 0.000000  
P210: 0.000000  
P211: 0.000000  
P212: 0.000000  
P213: 0.000000  
P214: 0.000000  
P215: 0.000000  
P216: 0.000000  
P217: 0.000000  
P218: 0.000000  
P219: 0.000000  
P220: 0.000000  
P221: 0.000000  
P222: 0.000000  
P223: 0.000000  
P224: 0.000000  
P225: 0.000000  
P226: 0.000000  
P227: 0.000000  
P228: 0.000000  
P229: 0.000000  
P230: 0.000000  
P231: 0.000000  
P232: 0.000000  
P233: 0.000000  
P234: 0.000000  
P235: 0.000000  
P236: 0.000000  
P237: 0.000000  
P238: 0.000000  
P239: 0.000000  
P240: 0.000000  
P241: 0.000000  
P242: 0.000000  
P243: 0.000000  
P244: 0.000000  
P245: 0.000000  
P246: 0.000000  
P247: 0.000000  
P248: 0.000000  
P249: 0.000000  
P250: 0.000000  
P251: 0.000000  
P252: 0.000000  
P253: 0.000000  
P254: 0.000000  
P255: 0.0000



## Synthesis of 14

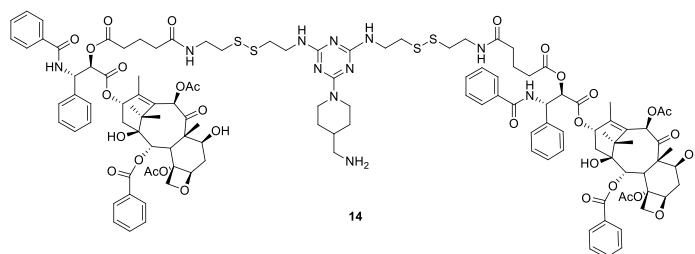

**Intermediate 14.** To a solution of compound **13** (358 mg, 0.15 mmol) in THF (24 mL) a solution of 4-aminomethylpiperidine (529 mg, 4.6 mmol) in THF (2 mL) was added at room temperature. The solution was stirred under nitrogen for 19 h at room temperature. The volume of reaction was reduced to 5 mL *in vacuo* then diluted with dichloromethane (30 mL). The solution was washed two times with brine (20 mL), dried over MgSO<sub>4</sub>, and then concentrated. The crude product was purified by column chromatography (DCM:MeOH = 10:1; TLC R<sub>f</sub> = 0.3 with DCM:MeOH = 10:1) to give **14** as a foam (329 mg, 89 %). <sup>1</sup>H NMR (300 MHz, CDCl<sub>3</sub>+MeOH-d<sub>4</sub>): δ 8.14 (d, *J* = 6.9, 4H, i), 7.80 (d, *J* = 7.2, 4H, c), 7.65 (t, *J* = 7.5 Hz, 2H, g), 7.58-7.29 (m, 20H, a, b, d, e, f, h), 6.39 (s, 2H, y), 6.16 (t, *J* = 9.0, 2H, n), 5.93 (d, *J* = 4.2, 2H, l), 5.70 (d, *J* = 7.2, 2H, q), 5.46 (d, *J* = 4.2, 2H, m), 5.01 (d, *J* = 9.0, 2H, u), 4.8 (br s, 2H, h<sub>e</sub>''), 4.39 (dd, *J* = 10.8, 6.6, 2H, w), 4.32 (d, *J* = 8.1, 2H, t), 4.25 (d, *J* = 8.1, 2H, t), 3.82 (d, *J* = 6.9, 2H, r), 3.69 (br s, 4H, g'), 3.49 (t, *J* = 6.3 Hz, 4H, j'), 3.39-3.34 (m, 2H, k''), 2.89-2.74 (m, 8H, h', i'), 2.56-2.43 (m, 8H, d', f', h<sub>a</sub>'', v), 2.43 (s, 6H, j), 2.31-2.11 (m, 8H, d', f', o), 2.22 (s, 6H, k), 2.08-1.78 (m, 9H, e', j'', i<sub>e</sub>'', i<sub>a</sub>'', v), 1.96 (s, 6H, z), 1.69 (s, 6H, c'), 1.20 (s, 6H, b'), 1.17 (s, 6H, a'); <sup>13</sup>C NMR (75 MHz, CDCl<sub>3</sub>+MeOH-d<sub>4</sub>) δ = 205.0 (q'), 174.4(p'), 173.5(o'), 172.0(n'), 171.0(z'), 169.9(m'), 169.9(j'), 169.9(k'), 167.6(l'), 165.3(y'), 142.7(r'), 137.8(g'), 134.8(g), 134.5(h'), 134.2(s'), 132.9(d), 131.1(i), 130.6(i'), 130.0(b), 129.5(a), 129.5(e), 129.5(h), 128.3(c), 127.9(f), 85.6(u), 82.1(s), 78.9(p), 77.5(t), 76.6(y), 76.0(q), 75.2(m), 73.0(n), 72.4(w), 68.9 (h''), 59.2(x), 54.1(l), 46.9(r), 44.3 (k''), 44.0(t'), 40.5(x'), 39.2(u'), 38.8(v'), 38.3(w'), 36.9(o), 36.3(v), 35.7(f'), 33.8(d'), 30.5(i''), 27.5(j''), 26.5(b'), 23.5(j), 22.9(a'), 21.8(e'), 21.8(k), 15.5(z), 10.7(c'); HRMS (ESI) calcd for C<sub>121</sub>H<sub>146</sub>N<sub>11</sub>O<sub>32</sub>S<sub>4</sub> 2392.90182, found 2392.8223 (M+H)<sup>+</sup>.

[illegible]



CH-113-11-C13  
 127°C/5mm  
 gate=18 run with FID/MS before acquisition  
 Sample 1201 13.1821841.45  
 F1 file 6.2113422\_187.mh1a.acq.ms  
 Acquisition 01/06/2017 17:00:07 / Instrument / name: cryo/ data: ms1701\_061.d1  
 Pulse Sequence: czi: hzgpg30  
 Solvent: cdcl3  
 Acquisition Parameters  
 Date\_ Acquired: 01/06/2017  
 Time: 17:00:07  
 File: 6.2113422\_187.mh1a.acq.ms  
 Name: CH-113-11-C13  
 Experiment: 113a-CDCl3.d1  
 Reference: 1270000  
 Acquisition  
 File Name: delay 2: 0.00 sec  
 Pulse: 07.0 degrees  
 Acq. Time: 1.200 sec  
 F2 file 6.2113422\_187.mh1a.acq.ms  
 11300 Acquisition  
 01/06/2017 17:00:07  
 F1 file 6.2113422\_187.mh1a.acq.ms  
 Power: 05.00  
 11300 Acquisition  
 01/06/2017 17:00:07  
 Data Processing  
 11300 Processing 8.5 sec  
 Total time 19 hr, 18 min, 36 sec

## Synthesis of HPLC Standard 15

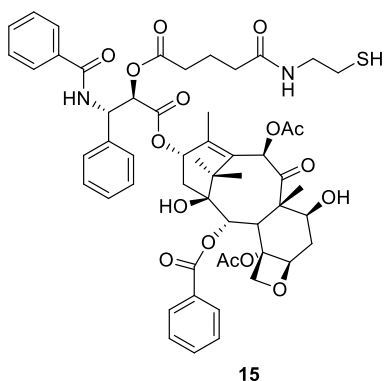

**Compound 15.** To a solution of **12** (12 mg, 0.011 mmol) in DCM (1.0 mL) a solution of dithiothreitol (8.4 mg, 0.054 mmol) in DCM (1.0 mL) was added at 0°C. The reaction warmed to room temperature then stirred for 6 h. After concentration, the crude product was purified by column chromatography (DCM:MeOH = 10:1; TLC  $R_f$  = 0.28 with DCM:MeOH = 10:1) to give **15** as a foam (9.5 mg, 85 %).  $^1\text{H}$  NMR (300 MHz,  $\text{CDCl}_3$ ):  $\delta$  8.15 (d,  $J$  = 7.8, 2H, i), 7.78 (d,  $J$  = 8.4, 2H, c), 7.62 (t,  $J$  = 7.2 Hz, 1H, g), 7.54-7.23 (m, 10H, a, b, d, e, f, h), 6.30 (s, 1H, y), 6.24 (t,  $J$  = 9.3, 1H, n), 6.19 (d,  $J$  = 6.3, 1H, NH), 5.98 (dd,  $J$  = 9.3, 3.6, 1H, l), 5.69 (d,  $J$  = 6.9, 1H, q), 5.49 (d,  $J$  = 8.4, 2H, m), 4.98 (d,  $J$  = 9.0, 1H, u), 4.47 (dd,  $J$  = 10.5, 6.0, 1H, w), 4.32 (d,  $J$  = 8.4, 1H, t), 4.20 (d,  $J$  = 8.4, 1H, t), 3.81 (d,  $J$  = 7.2, 1H, r), 3.66 (t,  $J$  = 4.8, 1H, SH), 3.34-3.28 (m, 2H, g'), 2.74-2.31 (m, 8H, h', d', f', v, o), 2.46 (s, 3H, j), 2.22 (s, 3H, k), 2.21-2.11 (m, 1H, o), 2.00-1.80 (m, 3H, e' v), 1.95 (s, 3H, z), 1.68 (s, 3H, c'), 1.25 (s, 3H, b'), 1.14 (s, 3H, a'); HRMS (ESI) calcd for  $\text{C}_{54}\text{H}_{63}\text{N}_2\text{O}_{16}\text{S}$  ( $\text{M}+\text{H}$ ) $^+$  1027.3893, found 1027.5400.

Figure S38. Mass Spectrum of 15.

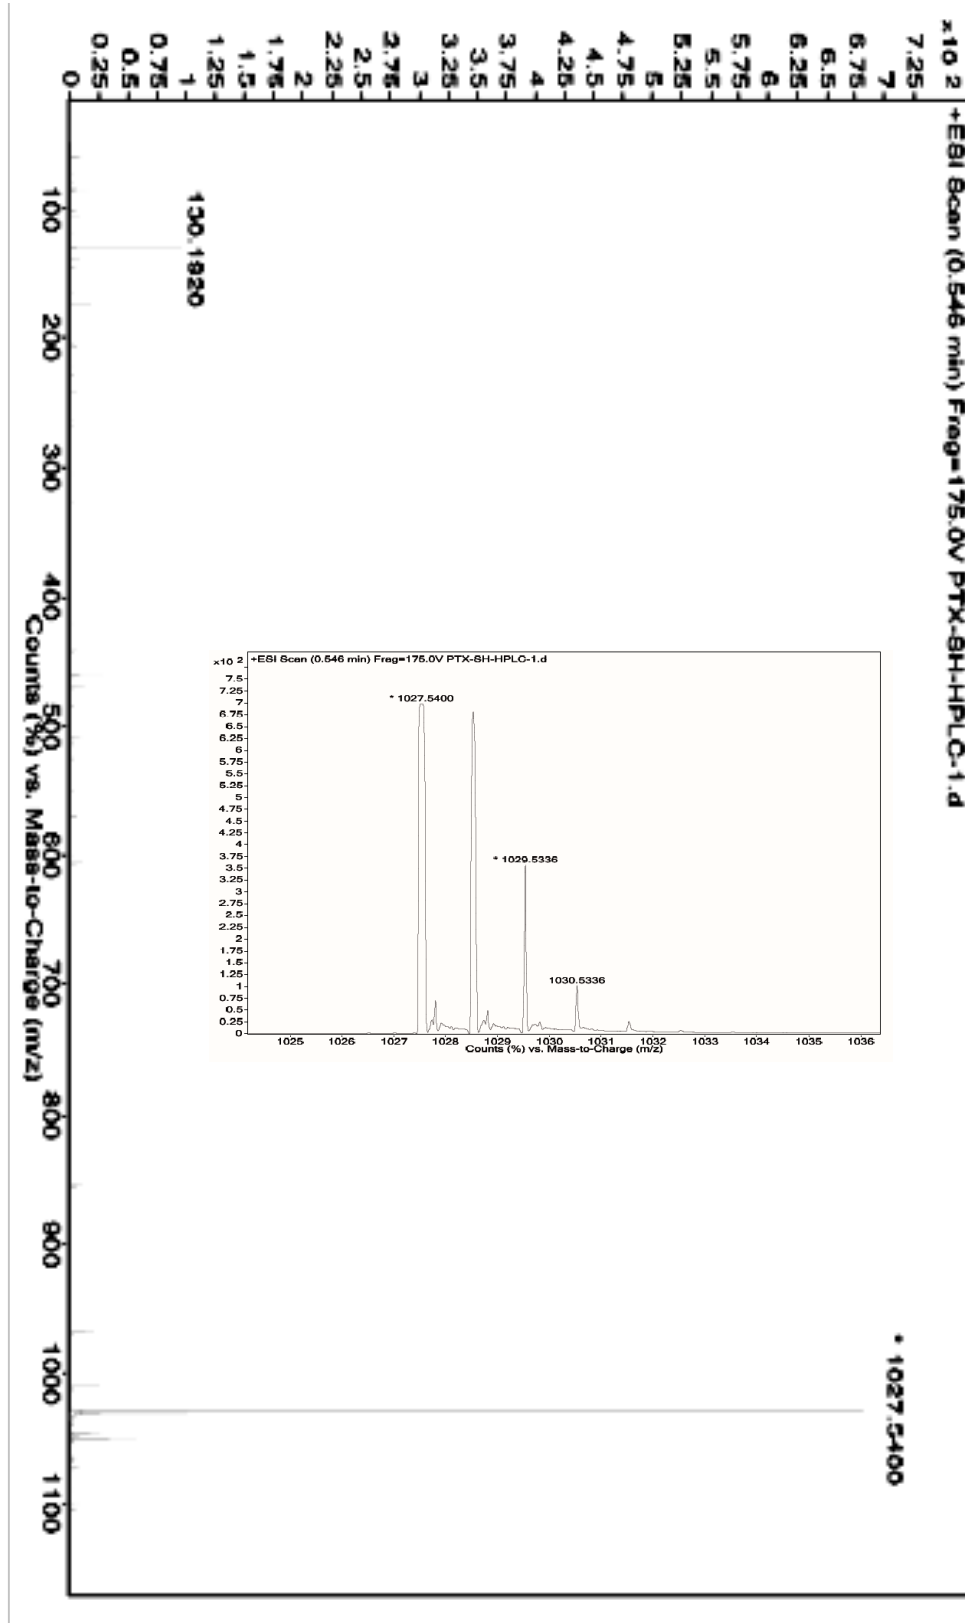

Figure S39.  $^1\text{H}$  NMR Spectrum of 15.

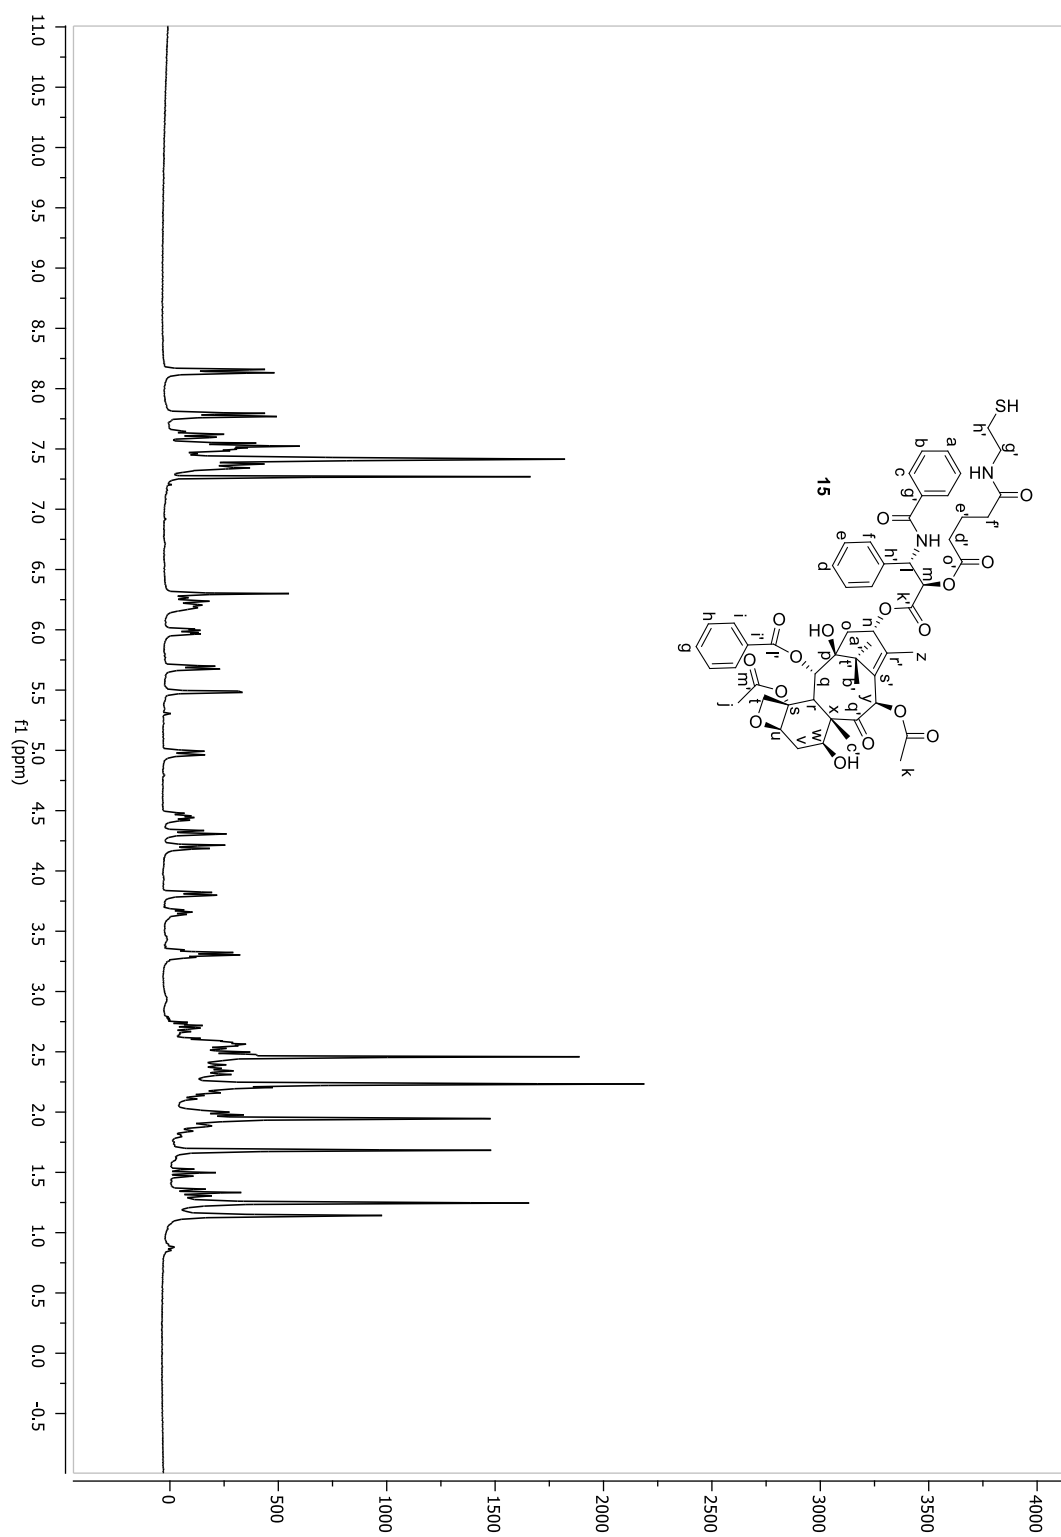

**Figure S40.** The light-scattering distribution analysis of **1**. Molecular modeling suggests a much smaller radius (3nm) than that measured >10nm. We hypothesize an equilibrium between a discrete aggregate of these dimensions and the 100 nm super-aggregates.

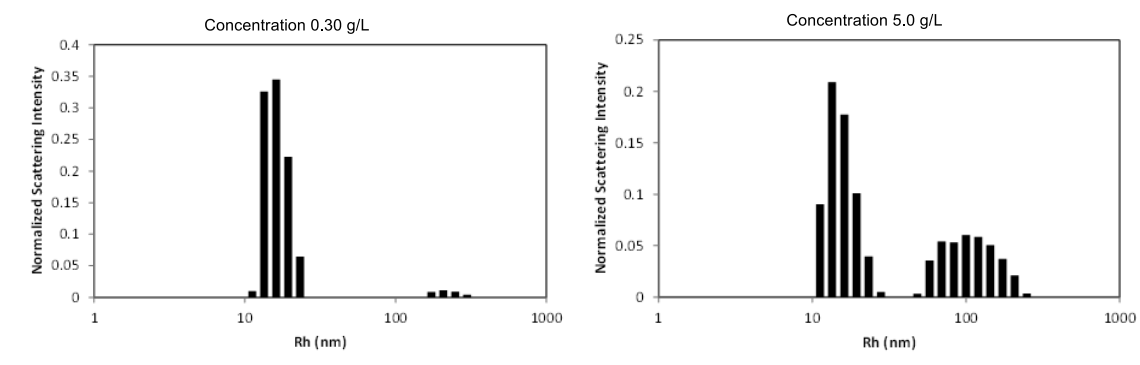



**Figure S41.** Cumelative release of paclitaxel from **1**. The slow release observed here compared with the >10% release observed with prodrug **3** makes this construct less attractive.

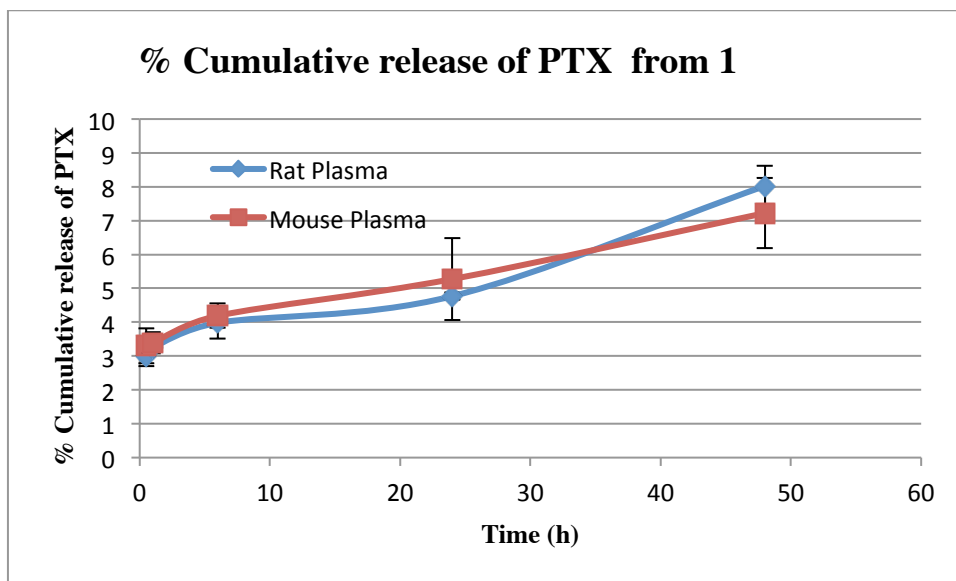

**Figure S42. Release of PTX from prodrug 1 in plasma derived from mouse and rat.**

The broad peaks of the traces and negligible amount of release makes interpretation challenging.

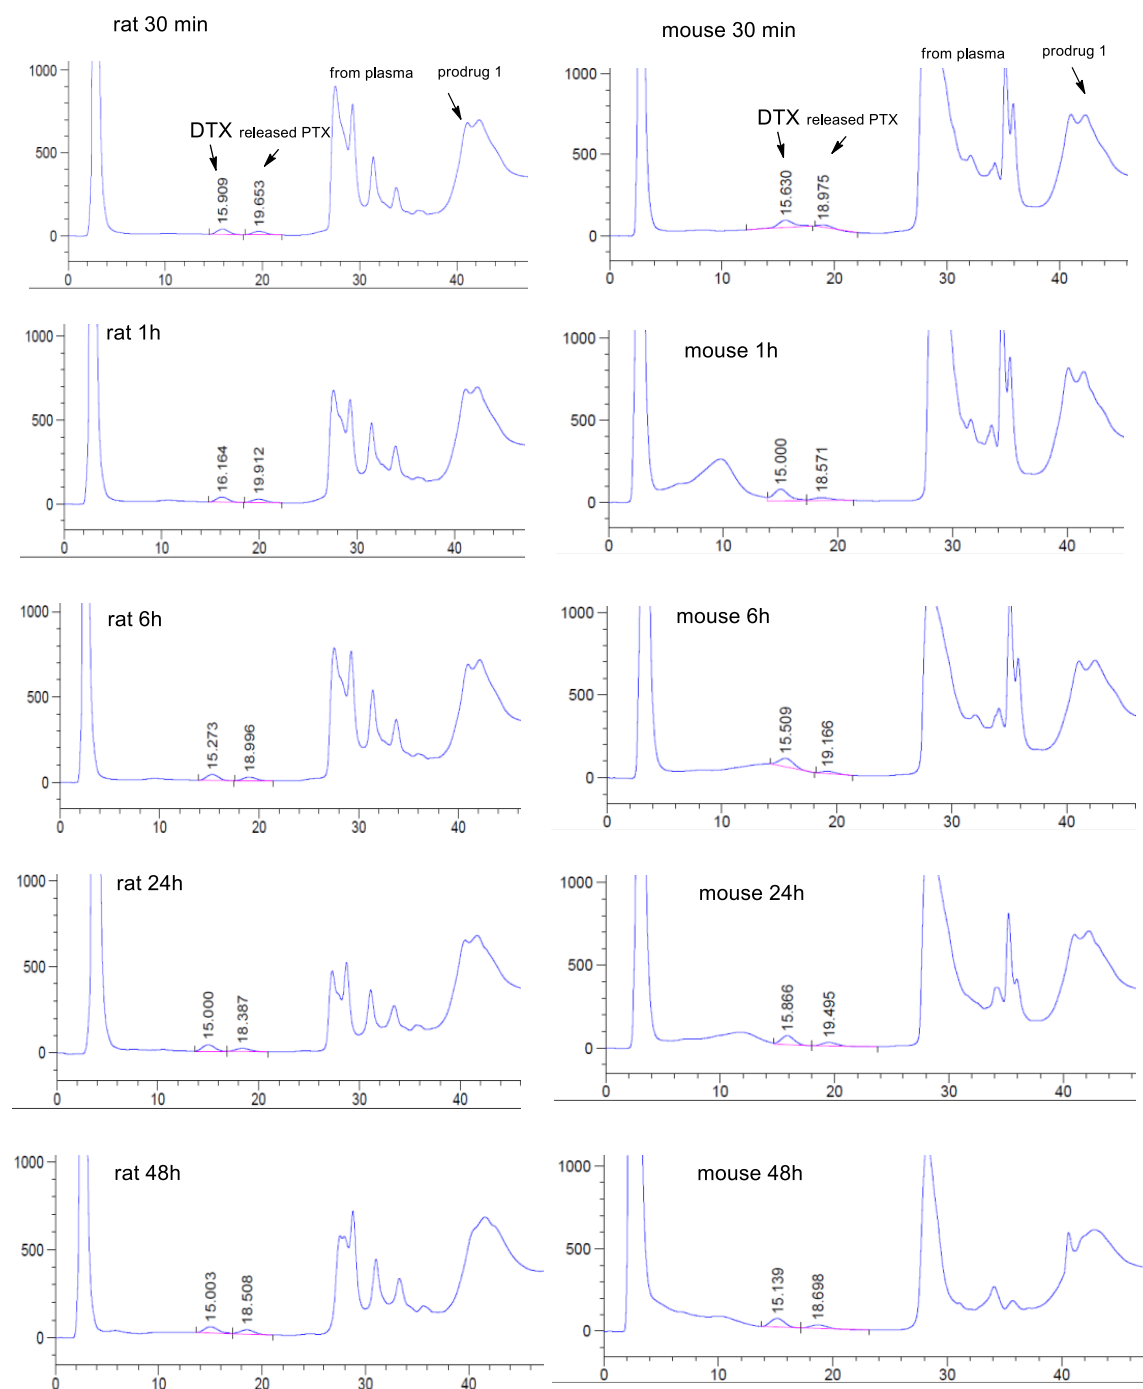

**Figure S43. Model Release Studies by Disulfide Cleavage of 1, 12, and Model 16.**

Top traces: Addition of DTT to **1** leads to disulfide cleavage and a peak corresponding to model compound **15** and shift in the position of the dendrimer. Middle traces: Intermediate **12** also produces **15** on incubation with DTT. Bottom: A standard to establish where the amide hydrolysis product, acid **16**, appears. Paclitaxel appears around 15 minutes in these conditions.

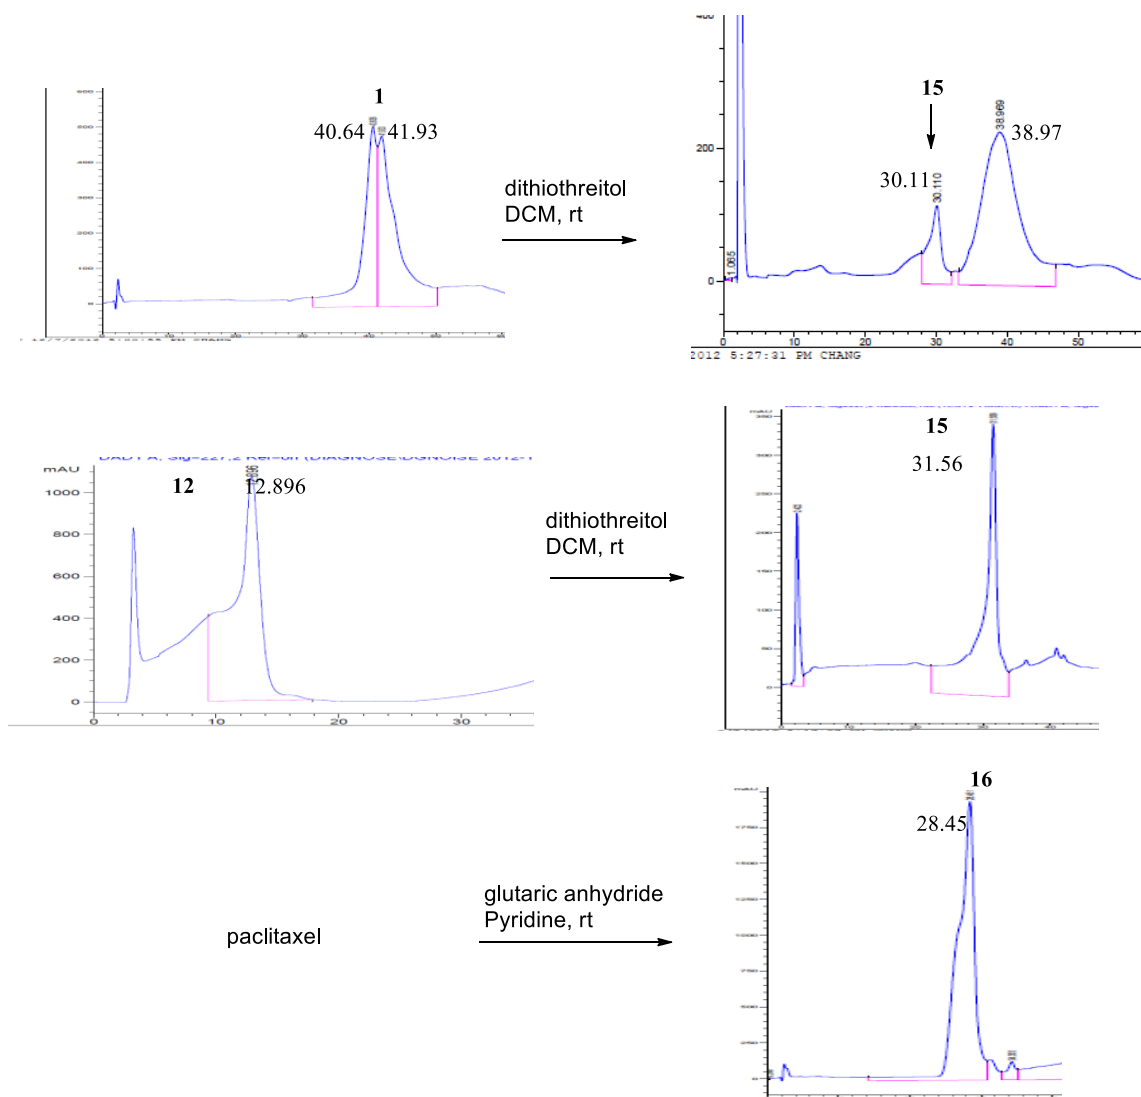

**Figure S44. Plasma release with Model 12.** Compound **12** appears rapidly degraded in plasma (in comparison to **1**) with appearance of paclitaxel in rat plasma (left). Disappearance of **12** in mouse plasma occurs at a similar rate to rat plasma, but paclitaxel is not observed. Plasma peaks do not allow us to quantitate the appearance (if any) of thiol **15** and the acid intermediate **16**.

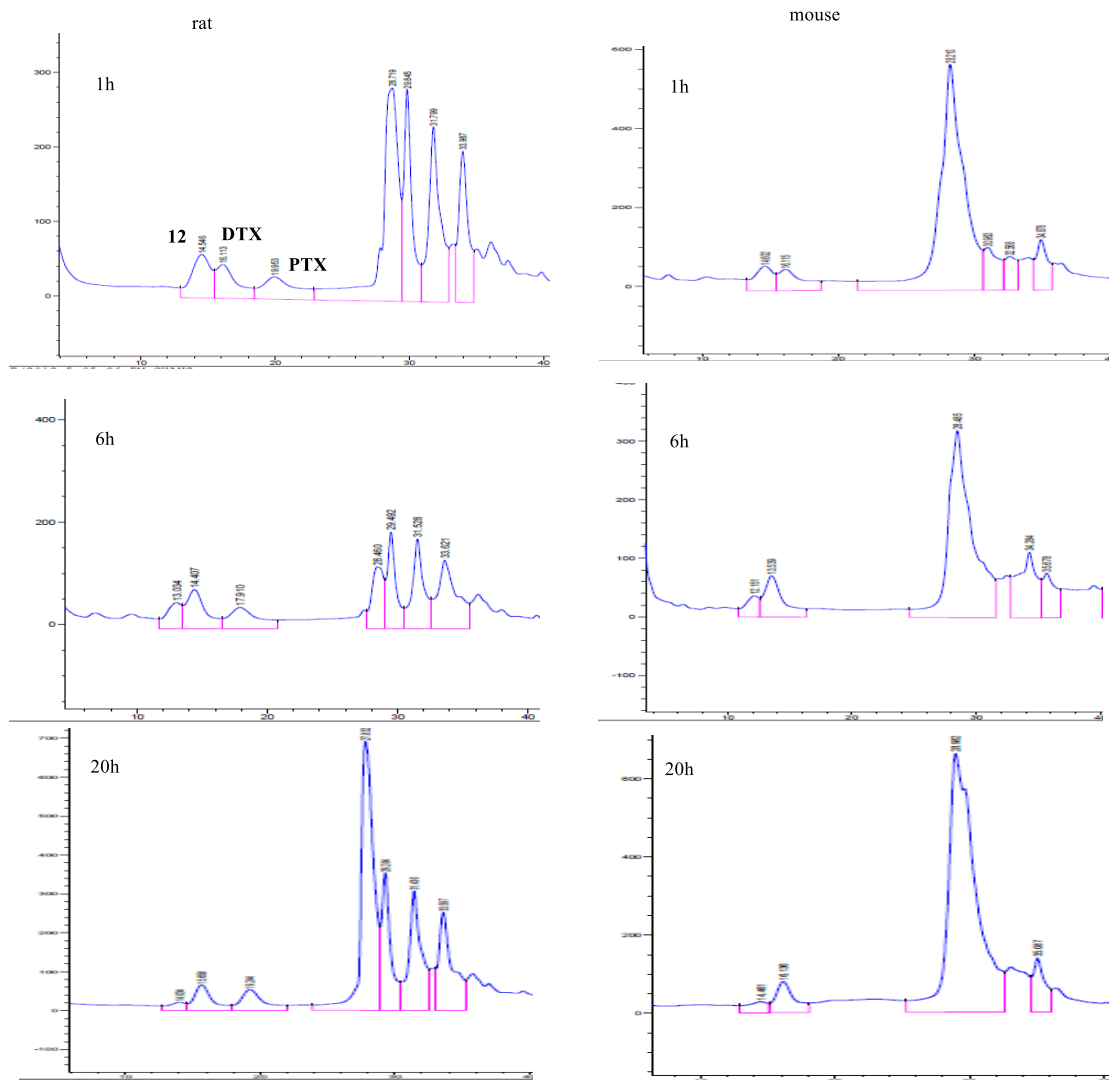

**Supporting Table 1. Cumulative Excretion Data of 1 and 3 from Urine and Feces.**

| Prodrug | %ID/g in urine |      | %ID/organ in feces |      |
|---------|----------------|------|--------------------|------|
|         | 24h            | 48h  | 24h                | 48h  |
| 1       | 4.25           | 5.47 | 0.27               | 0.36 |
| 3       | 42.7           | 49.7 | 2.7                | 3.3  |

**Supporting Table 2. The elimination and distribution half-lives of 1 and 3.**

|         |      | paclitaxel |                 | PEG  |        | Half-lives (h)  |                |
|---------|------|------------|-----------------|------|--------|-----------------|----------------|
| Prodrug | MW   | number     | linker          | size | linker | $t_{1/2\alpha}$ | $t_{1/2\beta}$ |
| 1       | 61   | 16         | ester/disulfide | 5KDa | ester  | 1.1             | 38             |
| 3       | 37.8 | 12         | ester/disulfide | 2Kda | ester  | 0.4             | 19.3±2.1       |

**Figure S45. Biodistribution at 48 for 1 in SCID-PC-3 mice.** Data are presented as %ID/g  $\pm$  s.d. (n = 4).

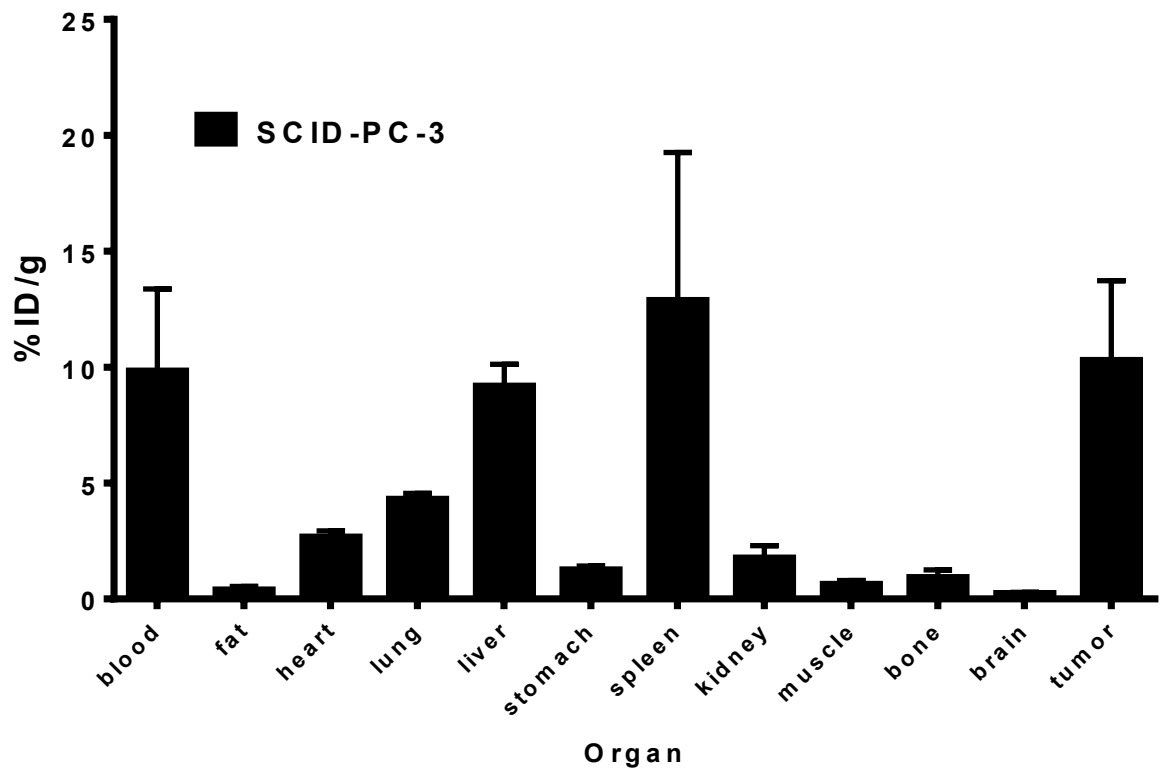

Supplement: Supplementary file 1 [file 3987001]
